# Supplementary material
Source: HighWire-hosted journal article supplement (https://bmjopen.bmj.com/content/12/4/e057017)
Supplement: inline-supplementary-material-1 [file inline-supplementary-material-1.pdf]

# Supplementary appendix

Supplement to: Ho ISS, Azcoaga-Lorenzo A, Akbari A, et al. Variation in the estimated prevalence of multimorbidity: systematic review and meta-analysis of 193 studies.

## Table of Contents

|                                                                                                                                                                                     |    |
|-------------------------------------------------------------------------------------------------------------------------------------------------------------------------------------|----|
| Table S1: Search strategy.....                                                                                                                                                      | 3  |
| Table S2: Summary of the characteristics of outlying studies.....                                                                                                                   | 4  |
| Table S3: Characteristics of 24 outlying studies.....                                                                                                                               | 5  |
| Table S4: Characteristics of 193 included studies .....                                                                                                                             | 9  |
| Table S5: Associations between predictors .....                                                                                                                                     | 25 |
| Table S6: Risk of bias assessment of included studies .....                                                                                                                         | 26 |
| Table S7: Output of adjusted meta-analytic model based on 217 studies .....                                                                                                         | 39 |
| Table S8: Definition of variables .....                                                                                                                                             | 40 |
| Figure S1: Graphical display of study effect sizes and heterogeneity .....                                                                                                          | 41 |
| Figure S2: Process of examining and identifying outlying studies in meta-analysis .....                                                                                             | 42 |
| Figure S3: Summary of risk of bias assessment .....                                                                                                                                 | 43 |
| Figure S4: Meta-regression trees for predicting the pooled estimated prevalence of multimorbidity (based on 'mean age' and 'number of conditions' predictors. unit: log(odds))..... | 44 |
| References .....                                                                                                                                                                    | 45 |

Table S1: Search strategy

| Database                                                                                            | Search strategy                                                                                                                                                                                                                                                                                                                                                                                                                                                                                                                                                                                    |
|-----------------------------------------------------------------------------------------------------|----------------------------------------------------------------------------------------------------------------------------------------------------------------------------------------------------------------------------------------------------------------------------------------------------------------------------------------------------------------------------------------------------------------------------------------------------------------------------------------------------------------------------------------------------------------------------------------------------|
| <p><u>Ovid Interface</u></p> <p>PsycINFO</p> <p>Embase</p> <p>Global Health</p> <p>Ovid MEDLINE</p> | <ol style="list-style-type: none"> <li>1. (multimorbidit\$ or multi-morbidit\$ or comorbidit\$ or co-morbidit\$ or polymorbidit\$ or poly-morbidit\$ or multicondition\$ or multicondition\$ or "multiple chronic condition\$" or "morbidity burden" or ((multiple or coexisting or co-existing or concurrent or con-current or comorbid or co-morbid) adj2 (disease\$ or illness\$ or condition\$ or diagnos\$ or morbid\$))).m_titl.</li> <li>2. (measure\$ or index or indices or instrument\$ or scale\$ or "disease count\$").mp.</li> <li>3. 1 and 2</li> <li>4. Limit 3 to human</li> </ol> |
| <p><u>EBSCO Interface</u></p> <p>CINAHL Plus</p>                                                    | <ol style="list-style-type: none"> <li>1. MM (multimorbidit* or multi-morbidit* or comorbidit* or co-morbidit* or polymorbidit* or poly-morbidit* or multicondition* or multicondition* or "multiple chronic condition*" or "morbidity burden" or ((multiple or coexisting or co-existing or concurrent or con-current or comorbid or co-morbid) N2 (disease* or illness* or condition* or diagnos* or morbid*)))</li> <li>2. AB (measure* or index or indices or instrument* or scale*)</li> <li>3. 1 AND 2</li> </ol> <p>Limiters – Full Text; Human; Language: English</p>                      |
| Scopus                                                                                              | TITLE ( multimorbidit* or multi-morbidit* or comorbidit* or co-morbidit* or polymorbidit* or poly-morbidit* or multicondition* or multicondition* or "multiple chronic condition*" or "morbidity burden" or ( ( multiple or coexisting or co-existing or concurrent or con-current or morbid or co-morbid ) W/2 ( disease* or illness* or condition* or diagnos?s or morbid* ) ) ) AND TITLE (measure* or index or indices or instrument* or scale* or "disease counts")                                                                                                                           |
| Web of Science                                                                                      | (TI=(measure* or index or indices or instrument* or scale*))AND (TI=(multimorbidit* or multi-morbidit* or comorbidit* or co-morbidit* or polymorbidit* or poly-morbidit* or multicondition* or multicondition* or 'multiple chronic condition*' or 'morbidity burden' or ((multiple or coexisting or co-existing or concurrent or con-current or comorbid or co-morbid) NEAR/2 (disease* or illness* or condition* or diagnos* or morbid*)))) AND LANGUAGE: (English)                                                                                                                              |
| Cochrane library                                                                                    | (multimorbidity or multi-morbidity or comorbidity or co-morbidity or polymorbidity or poly-morbidity or multicondition or multicondition or 'multiple chronic conditions' or 'morbidity burden' or ((multiple or coexisting or co-existing or concurrent or con-current or comorbid or co-morbid) NEAR/2 (disease or illness or condition or diagnosis or morbid))) AND (measure or index or indices or instrument or scale or "disease count*"):ti                                                                                                                                                |
| ProQuest Dissertations & Theses Global                                                              | ti((multimorbidit* OR multi-morbidit* OR comorbidit* OR co-morbidit* OR polymorbidit* OR poly-morbidit* OR multicondition* OR multicondition* OR 'multiple chronic condition*' OR 'morbidity burden' OR ((multiple OR coexisting OR co-existing OR concurrent OR con-current OR morbid OR co-morbid) NEAR/2 (disease* OR illness* OR condition* OR diagnos?s OR morbid*)))) AND noft((measure* OR index OR indices OR instrument* OR scale*))<br><br>Limited by: Manuscript type: Doctoral dissertations, Master's theses<br>Language: English                                                     |

**Table S2: Summary of the characteristics of outlying studies**

| Name of variable                           | Outlying studies (n=24)                                                           | All studies (n=217)                                                              |
|--------------------------------------------|-----------------------------------------------------------------------------------|----------------------------------------------------------------------------------|
| <b>Prevalence of multimorbidity (%)</b>    | Range: 7.3 to 89.1<br>Pooled prevalence with the REML estimator: 31.0 (21.6–42.2) | Range: 2.7–95.6<br>Pooled prevalence with the REML estimator: 41.1 (37.7–44.6)   |
| <b>Mean age of study population (year)</b> | Range of mean age: 39.6 to 82.2<br>Median of mean age: 56.6 (Q1, Q3: 52.3, 66.4)  | Range of mean age: 32.2 to 83.8<br>Median of mean age: 62.4 (Q1, Q3: 50.2, 72.0) |
| <b>No of conditions (count)</b>            | Range: 7 to 259<br>Median: 34 (Q1, Q3: 19.5, 54.5)                                | Range: 3 to 259<br>Median: 14.0 (Q1, Q3: 9, 21)                                  |
| <b>Country income (count, %)</b>           |                                                                                   |                                                                                  |
| High income                                | 21 (87.5%)                                                                        | 166 (76.5%)                                                                      |
| Low- or Middle-income                      | 3 (11.5%)                                                                         | 51 (23.5%)                                                                       |
| <b>Continent (count, %)</b>                |                                                                                   |                                                                                  |
| Europe                                     | 6 (25.0%)                                                                         | 70 (32.3%)                                                                       |
| North America                              | 7 (29.2%)                                                                         | 54 (24.9%)                                                                       |
| Asia                                       | 7 (29.2%)                                                                         | 51 (23.5%)                                                                       |
| Australasia                                | 3 (12.5%)                                                                         | 14 (6.5%)                                                                        |
| Multiple continents                        | 1 (4.2%)                                                                          | 12 (5.5%)                                                                        |
| South America                              |                                                                                   | 12 (5.5%)                                                                        |
| Africa                                     |                                                                                   | 4 (1.8%)                                                                         |
| <b>Study population (count, %)</b>         |                                                                                   |                                                                                  |
| Only older people                          | 2 (8.3%)                                                                          | 65 (30.0%)                                                                       |
| Middle-aged and older                      | 1 (4.2%)                                                                          | 47 (21.7%)                                                                       |
| All adults                                 | 15 (62.5%)                                                                        | 99 (45.6%)                                                                       |
| Only children                              | 1 (4.2%)                                                                          | 1 (0.5%)                                                                         |
| All age population                         | 5 (20.8%)                                                                         | 5 (2.3%)                                                                         |
| <b>Setting (count, %)</b>                  |                                                                                   |                                                                                  |
| Community                                  | 12 (50.0%)                                                                        | 159 (73.3%)                                                                      |
| Primary care                               | 7 (29.2%)                                                                         | 39 (18.0%)                                                                       |
| Hospital                                   | 4 (16.7%)                                                                         | 18 (8.3%)                                                                        |
| Care home                                  | 1 (4.2%)                                                                          | 1 (0.5%)                                                                         |
| <b>Source (count, %)</b>                   |                                                                                   |                                                                                  |
| Self-report                                | 8 (33.3%)                                                                         | 158 (72.8%)                                                                      |
| Database                                   | 16 (66.6%)                                                                        | 59 (27.2%)                                                                       |
| <b>Risk of bias assessment (count, %)</b>  |                                                                                   |                                                                                  |
| Low                                        | 4 (16.7%)                                                                         | 13 (6.0%)                                                                        |
| Moderate                                   | 19 (79.2%)                                                                        | 181 (83.4%)                                                                      |
| High                                       | 1 (4.2%)                                                                          | 23 (10.6%)                                                                       |

IQR: Interquartile range. SD: Standard deviation. The percentages were rounded so they do not add up to 100%.

**Table S3: Characteristics of 24 outlying studies**

| Author                            | Country     | Continent     | Country income | Setting   | Study population                | Mean age     | No of participants | Source                                      | No of conditions measured | No of MM cases | Proportion with MM | Risk of bias | Rationale for exclusion                                                                                                                                                                           |
|-----------------------------------|-------------|---------------|----------------|-----------|---------------------------------|--------------|--------------------|---------------------------------------------|---------------------------|----------------|--------------------|--------------|---------------------------------------------------------------------------------------------------------------------------------------------------------------------------------------------------|
| <sup>1</sup> Stanley et al (2018) | New Zealand | Australasia   | High           | Hospitals | All adults                      | Not reported | 3489747            | Medical records and administrative database | 61                        | 275706         | 0.08               | Moderate     | Contributing to high levels of heterogeneity of effect sizes (Leave-one-out analysis) and the studentized residual of this study is more than 2 standard deviations away from its expected value. |
| <sup>2</sup> Lenzi et al (2016)   | Italy       | Europe        | High           | Hospitals | All adults                      | 66.4         | 3759836            | Medical records and administrative database | 26                        | 574208         | 0.15               | Moderate     | Contributing to high levels of heterogeneity of effect sizes (Leave-one-out analysis)                                                                                                             |
| <sup>3</sup> Hu et al (2019)      | Taiwan      | Asia          | High           | Community | All adults                      | Not reported | 1429527            | Medical records and administrative database | 20                        | 939485         | 0.66               | Low          | Contributing to high levels of heterogeneity of effect sizes (Leave-one-out analysis)                                                                                                             |
| <sup>4</sup> Gawron et al (2020)  | USA         | North America | High           | Hospitals | All adults but not older people | Not reported | 741612             | Medical records and administrative database | Not reported              | 53824          | 0.07               | Moderate     | Contributing to high levels of heterogeneity of effect sizes (Leave-one-out analysis) and the studentized residual of this study is more than 2 standard deviations away from its expected value. |
| <sup>5</sup> Low et al (2019)     | Singapore   | Asia          | High           | Community | All adults                      | 39.6         | 1181024            | Self-report                                 | 48                        | 309428         | 0.26               | Low          | Contributing to high levels of heterogeneity of effect sizes (Leave-one-out analysis)                                                                                                             |
| <sup>6</sup> Wang et al (2014)    | China       | Asia          | Low or middle  | Community | Whole population                | Not reported | 162464             | Self-report                                 | 40                        | 17987          | 0.11               | Low          | Contributing to high levels of heterogeneity of effect sizes (Leave-one-out analysis)                                                                                                             |
| <sup>7</sup> Gaulin et al (2019)  | Canada      | North America | High           | Hospitals | All adults                      | 51.2         | 1316832            | Medical records and administrative database | 34                        | 416282         | 0.32               | Moderate     | Contributing to high levels of heterogeneity of effect sizes (Leave-one-out analysis)                                                                                                             |

| Author                              | Country  | Continent     | Country income | Setting      | Study population      | Mean age     | No of participants | Source                                      | No of conditions measured | No of MM cases | Proportion with MM | Risk of bias | Rationale for exclusion                                                                                                                                                                    |
|-------------------------------------|----------|---------------|----------------|--------------|-----------------------|--------------|--------------------|---------------------------------------------|---------------------------|----------------|--------------------|--------------|--------------------------------------------------------------------------------------------------------------------------------------------------------------------------------------------|
| <sup>8</sup> Violan et al (2014)    | Spain    | Europe        | High           | Primary care | All adults            | 47.4         | 1356761            | Medical records and administrative database | 146                       | 645818         | 0.48               | Moderate     | Contributing to high levels of heterogeneity of effect sizes (Leave-one-out analysis)                                                                                                      |
| <sup>9</sup> Nicholson et al (2019) | Canada   | North America | High           | Primary care | All adults            | 52.3         | 367743             | Medical records and administrative database | 20                        | 195838         | 0.53               | High         | Contributing to high levels of heterogeneity of effect sizes (Leave-one-out analysis)                                                                                                      |
| <sup>10</sup> Bao et al (2019)      | China    | Asia          | Low or middle  | Community    | Middle aged and older | 61.36        | 18137              | Self-report                                 | 19                        | 3773           | 0.21               | Moderate     | Contributing to high levels of heterogeneity of effect sizes (Leave-one-out analysis)                                                                                                      |
| <sup>11</sup> Fortin et al (2005)   | Canada   | North America | High           | Primary care | All adults            | 56.55        | 980                | Medical records and administrative database | 14                        | 873            | 0.89               | Moderate     | The studentized residual of this study is more than 2 standard deviations away from its expected value.                                                                                    |
| <sup>12</sup> Prazeres et al (2015) | Portugal | Europe        | High           | Primary care | All adults            | 56.3         | 1993               | Medical records and administrative database | 147                       | 1449           | 0.73               | Moderate     | Its Mahalanobis distance exceeds the chi-squared critical value at a 0.01 significance level (multivariate outlier detection)                                                              |
| <sup>13</sup> Lawson et al (2013)   | UK       | Europe        | High           | Community    | All adults            | 72.7         | 7054               | Medical records and administrative database | 40                        | 1243           | 0.18               | Moderate     | Irregular patterns found in compositional data (in scatter plot and Mahalanobis distance test)- low prevalence in studies with high mean participant age and a larger number of conditions |
| <sup>14</sup> Sullivan et al (2012) | USA      | North America | High           | Community    | All adults            | Not reported | 47178              | Medical records and administrative database | 259                       | 19666          | 0.42               | Moderate     | Its Mahalanobis distance exceeds the chi-squared critical value at a 0.01 significance level (multivariate outlier detection)                                                              |

| Author                               | Country     | Continent     | Country income | Setting      | Study population  | Mean age     | No of participants | Source                                      | No of conditions measured | No of MM cases | Proportion with MM | Risk of bias | Rationale for exclusion                                                                                                       |
|--------------------------------------|-------------|---------------|----------------|--------------|-------------------|--------------|--------------------|---------------------------------------------|---------------------------|----------------|--------------------|--------------|-------------------------------------------------------------------------------------------------------------------------------|
| <sup>15</sup> Peng et al (2020)      | China       | Asia          | Low or middle  | Community    | Only older people | 71.6         | 1321               | Self-report                                 | 15                        | 589            | 0.45               | Moderate     | Contributing to high levels of heterogeneity of effect sizes (in leave-one-out analysis)                                      |
| <sup>16</sup> Excoffier et al (2018) | Switzerland | Europe        | High           | Primary care | All adults        | 56.5         | 2904               | Medical records and administrative database | 75                        | 1513           | 0.52               | Moderate     | Its Mahalanobis distance exceeds the chi-squared critical value at a 0.01 significance level (multivariate outlier detection) |
| <sup>17</sup> Chung et al (2015)     | Hong Kong   | Asia          | High           | Community    | All adults        | Not reported | 25780              | Self-report                                 | 46                        | 3227           | 0.13               | Moderate     | Its Mahalanobis distance exceeds the chi-squared critical value at a 0.01 significance level (multivariate outlier detection) |
| <sup>18</sup> Ki et al (2017)        | South Korea | Asia          | High           | Community    | All adults        | 57.05        | 19942              | Medical records and administrative database | 66                        | 5979           | 0.30               | Moderate     | Its Mahalanobis distance exceeds the chi-squared critical value at a 0.01 significance level (multivariate outlier detection) |
| <sup>19</sup> Bobo et al (2016)      | USA         | North America | High           | Community    | Whole population  | Not reported | 138858             | Self-report                                 | 19                        | 33682          | 0.24               | Moderate     | Infrequent values in compositional categorical data (few studies focused on whole population)                                 |
| <sup>20</sup> Randall et al (2018)   | Australia   | Australasia   | High           | Community    | Whole population  | Not reported | 5437018            | Self-report                                 | 30                        | 660449         | 0.12               | Moderate     | Infrequent values in compositional categorical data (few studies focused on whole population)                                 |
| <sup>21</sup> Russell et al (2020)   | New Zealand | Australasia   | High           | Community    | Only children     | Not reported | 3838               | Self-report                                 | 7                         | 374            | 0.10               | Moderate     | Infrequent values in compositional categorical data (only one study focused on children population)                           |
| <sup>22</sup> Barnett et al (2012)   | UK          | Europe        | High           | Primary care | Whole population  | Not reported | 1751841            | Medical records and administrative database | 40                        | 406427         | 0.23               | Low          | Infrequent values in compositional categorical data (few studies focused on whole population)                                 |

| Author                               | Country                                                                                                                       | Continent           | Country income | Setting      | Study population  | Mean age     | No of participants | Source                                      | No of conditions measured | No of MM cases | Proportion with MM | Risk of bias | Rationale for exclusion                                                                       |
|--------------------------------------|-------------------------------------------------------------------------------------------------------------------------------|---------------------|----------------|--------------|-------------------|--------------|--------------------|---------------------------------------------|---------------------------|----------------|--------------------|--------------|-----------------------------------------------------------------------------------------------|
| <sup>23</sup> St Sauver et al (2015) | USA                                                                                                                           | North America       | High           | Primary care | Whole population  | Not reported | 106061             | Medical records and administrative database | 20                        | 34592          | 0.33               | Moderate     | Infrequent values in compositional categorical data (few studies focused on whole population) |
| <sup>24</sup> Vetrano et al (2016)   | Denmark, Finland, Iceland, Italy, the Netherlands, Norway, United Kingdom, Czech Republic, France, Sweden and Germany, Canada | Multiple continents | High           | Care homes   | Only older people | 82.2         | 6903               | Medical records and administrative database | 13                        | 5098           | 0.74               | Moderate     | Infrequent values in compositional categorical data (only one study focused on care home)     |

MM: Multimorbidity. No of participants: The total number of participants in the denominator for estimating prevalence in a study (which could be a subset in some included studies)

**Table S4: Characteristics of 193 included studies**

| Author                                    | Country         | Continent     | Country income | Setting      | Study population      | Mean age     | No of participants | Source                                      | No of conditions measured | No of MM cases | Proportion with MM | Risk of bias |
|-------------------------------------------|-----------------|---------------|----------------|--------------|-----------------------|--------------|--------------------|---------------------------------------------|---------------------------|----------------|--------------------|--------------|
| <sup>25</sup> Aarts et al (2012)          | The Netherlands | Europe        | High           | Primary care | All adults            | 55.4         | 1184               | Medical records and administrative database | 23                        | 420            | 0.35               | Moderate     |
| <sup>26</sup> Aarts et al (2011a)         | The Netherlands | Europe        | High           | Community    | Middle aged and older | 70           | 15188              | Self-report                                 | Not reported              | 7729           | 0.51               | Moderate     |
| <sup>27</sup> Aarts et al (2011b)         | The Netherlands | Europe        | High           | Primary care | All adults            | 55.4         | 1763               | Medical records and administrative database | 23                        | 985            | 0.56               | Moderate     |
| <sup>28</sup> Abizanda et al (2014)       | Spain           | Europe        | High           | Primary care | Only older people     | 78.6         | 842                | Medical records and administrative database | 14                        | 580            | 0.69               | Moderate     |
| <sup>29</sup> Agborsangaya et al (2012)   | Canada          | North America | High           | Community    | All adults            | 46.6         | 4003               | Self-report                                 | 16                        | 919            | 0.23               | Moderate     |
| <sup>30</sup> Agborsangaya et al (2013)   | Canada          | North America | High           | Community    | All adults            | 47.8         | 4803               | Self-report                                 | 16                        | 1729           | 0.36               | Moderate     |
| <sup>31</sup> Agborsangaya et al (2014)   | Canada          | North America | High           | Community    | All adults            | 47.7         | 4752               | Self-report                                 | 16                        | 1597           | 0.34               | Moderate     |
| <sup>32</sup> Ahrenfeldt et al (2019)     | Europe          | Europe        | High           | Community    | Middle aged and older | 66.25        | 244258             | Self-report                                 | 10                        | 90652          | 0.37               | Moderate     |
| <sup>33</sup> Alimohammadian et al (2017) | Iran            | Asia          | Low or middle  | Community    | Middle aged and older | Not reported | 49946              | Self-report                                 | 8                         | 10035          | 0.20               | Moderate     |
| <sup>34</sup> Angst et al (2002)          | Switzerland     | Europe        | High           | Primary care | All adults            | Not reported | 591                | Medical records and administrative database | 10                        | 201            | 0.34               | High         |

| Author                                 | Country                                                                           | Continent           | Country income | Setting      | Study population      | Mean age      | No of participants | Source                                      | No of conditions measured | No of MM cases | Proportion with MM | Risk of bias |
|----------------------------------------|-----------------------------------------------------------------------------------|---------------------|----------------|--------------|-----------------------|---------------|--------------------|---------------------------------------------|---------------------------|----------------|--------------------|--------------|
| <sup>35</sup> Appa et al (2014)        | USA                                                                               | North America       | High           | Community    | All adults            | 60.2          | 1997               | Self-report                                 | 16                        | 1417           | 0.71               | Moderate     |
| <sup>36</sup> Adams et al (2017)       | USA                                                                               | North America       | High           | Community    | All adults            | Not reported  | 400000             | Self-report                                 | 12                        | 191600         | 0.48               | Moderate     |
| <sup>37</sup> Ahmadi et al (2016)      | Iran                                                                              | Asia                | Low or middle  | Community    | Middle aged and older | 52.1          | 49946              | Self-report                                 | 8                         | 10035          | 0.20               | Moderate     |
| <sup>38</sup> Amaral et al (2018)      | Brazil                                                                            | South America       | Low or middle  | Community    | Only older people     | Not reported  | 264                | Self-report                                 | 8                         | 175            | 0.66               | Moderate     |
| <sup>39</sup> An et al (2016)          | South Korea                                                                       | Asia                | High           | Community    | Middle aged and older | 54.8          | 10118              | Self-report                                 | 8                         | 3228           | 0.32               | Moderate     |
| <sup>40</sup> Araujo et al (2018)      | Brazil                                                                            | South America       | Low or middle  | Community    | All adults            | Not reported  | 4001               | Self-report                                 | 12                        | 1160           | 0.29               | Moderate     |
| <sup>41</sup> Arnold-Reed et al (2018) | Australia                                                                         | Australasia         | High           | Primary care | All adults            | 38.2          | 4285               | Medical records and administrative database | 43                        | 2269           | 0.53               | Moderate     |
| <sup>42</sup> Arokiasamy et al (2015)  | 6 low middle income countries (China, Ghana, India, Mexico, Russia, South Africa) | Multiple continents | Low or middle  | Community    | All adults            | Not reported  | 42236              | Self-report                                 | 8                         | 9250           | 0.22               | Moderate     |
| <sup>43</sup> Sinnige et al (2015)     | The Netherlands                                                                   | Europe              | High           | Primary care | Middle aged and older | 66.9          | 120480             | Medical records and administrative database | 29                        | 74733          | 0.62               | Moderate     |
| <sup>44</sup> Zemedikun et al (2018)   | UK                                                                                | Europe              | High           | Community    | Middle aged and older | Median age 58 | 502643             | Medical records and administrative database | 36                        | 95710          | 0.19               | Moderate     |
| <sup>45</sup> Wensing et al (2001)     | The Netherlands                                                                   | Europe              | High           | Primary care | All adults            | Not reported  | 3867               | Self-report                                 | 25                        | 626            | 0.16               | Moderate     |
| <sup>46</sup> Mounce et al (2018)      | UK                                                                                | Europe              | High           | Community    | Middle aged and older | Not reported  | 4564               | Self-report                                 | 15                        | 1553           | 0.34               | Moderate     |
| <sup>47</sup> Taylor et al (2010)      | Australia                                                                         | Australasia         | High           | Community    | All adults            | Not reported  | 3206               | Self-report                                 | 7                         | 547            | 0.17               | Low          |

| Author                                 | Country                                                                                     | Continent           | Country income | Setting      | Study population      | Mean age     | No of participants | Source                                      | No of conditions measured | No of MM cases | Proportion with MM | Risk of bias |
|----------------------------------------|---------------------------------------------------------------------------------------------|---------------------|----------------|--------------|-----------------------|--------------|--------------------|---------------------------------------------|---------------------------|----------------|--------------------|--------------|
| <sup>48</sup> Vancampfort et al (2019) | Six low and middle income countries (China, Ghana, India, Mexico, Russia, and South Africa) | Multiple continents | Low or middle  | Community    | Middle aged and older | 62.4         | 34129              | Self-report                                 | 11                        | 15529          | 0.46               | Moderate     |
| <sup>49</sup> Vancampfort et al (2018) | Six low and middle income countries (China, Ghana, India, Mexico, Russia, and South Africa) | Multiple continents | Low or middle  | Community    | Only older people     | 72.6         | 14585              | Self-report                                 | 11                        | 8780           | 0.60               | Moderate     |
| <sup>50</sup> Aubert et al (2016)      | Switzerland                                                                                 | Europe              | High           | Primary care | Middle aged and older | 63.5         | 1002               | Medical records and administrative database | 17                        | 676            | 0.67               | Moderate     |
| <sup>51</sup> Autenrieth et al (2013)  | Germany                                                                                     | Europe              | High           | Community    | Only older people     | 75.7         | 1007               | Self-report                                 | 13                        | 658            | 0.65               | Moderate     |
| <sup>52</sup> Bahler et al (2015)      | Switzerland                                                                                 | Europe              | High           | Community    | Only older people     | 74.9         | 229493             | Medical records and administrative database | 22                        | 175752         | 0.77               | Moderate     |
| <sup>53</sup> Vancampfort et al (2017) | 44 low and middle income countries                                                          | Multiple continents | Low or middle  | Community    | All adults            | 38.3         | 194431             | Self-report                                 | 11                        | 27518          | 0.14               | Moderate     |
| <sup>54</sup> Banjare et al (2014)     | India                                                                                       | Asia                | Low or middle  | Community    | Only older people     | Not reported | 310                | Self-report                                 | 20                        | 176            | 0.57               | Moderate     |
| <sup>55</sup> Barra et al (2015)       | USA                                                                                         | North America       | High           | Community    | All adults            | 45.36        | 43079              | Self-report                                 | Not reported              | 22412          | 0.52               | Moderate     |
| <sup>56</sup> Bernard et al (2016)     | Australia                                                                                   | Australasia         | High           | Hospitals    | Only older people     | 81.8         | 306                | Medical records and administrative database | 19                        | 125            | 0.41               | High         |
| <sup>57</sup> Biswas et al (2019)      | Bangladesh                                                                                  | Asia                | Low or middle  | Community    | All adults            | Not reported | 8763               | Self-report                                 | 3                         | 1078           | 0.12               | Moderate     |

| Author                                        | Country                                                               | Continent           | Country income | Setting      | Study population      | Mean age     | No of participants | Source                                      | No of conditions measured | No of MM cases | Proportion with MM | Risk of bias |
|-----------------------------------------------|-----------------------------------------------------------------------|---------------------|----------------|--------------|-----------------------|--------------|--------------------|---------------------------------------------|---------------------------|----------------|--------------------|--------------|
| <sup>58</sup> Blakemore et al (2016)          | UK                                                                    | Europe              | High           | Primary care | Only older people     | 75           | 4377               | Self-report                                 | 24                        | 2631           | 0.60               | Moderate     |
| <sup>59</sup> Blyth et al (2008)              | Australia                                                             | Australasia         | High           | Community    | Only older people     | 76.9         | 1685               | Self-report                                 | 18                        | 920            | 0.55               | Moderate     |
| <sup>60</sup> Bowling et al (2019)            | USA                                                                   | North America       | High           | Community    | Middle aged and older | 56.7         | 4217               | Self-report                                 | 12                        | 3053           | 0.72               | Moderate     |
| <sup>61</sup> Britt et al (2008)              | Australia                                                             | Australasia         | High           | Primary care | All adults            | Not reported | 9156               | Medical records and administrative database | 18                        | 3398           | 0.37               | Moderate     |
| <sup>62</sup> Broeiro-Goncalves et al (2019)  | Portugal                                                              | Europe              | High           | Hospitals    | All adults            | 59.8         | 800376             | Medical records and administrative database | 22                        | 335357         | 0.42               | Moderate     |
| <sup>63</sup> Bruce et al (2010)              | Canada                                                                | North America       | High           | Community    | All adults            | 37.8         | 453                | Self-report                                 | 4                         | 163            | 0.36               | High         |
| <sup>64</sup> Burgers et al (2010)            | France, Germany, Canada, Australia, Netherlands, New Zealand, UK, USA | Multiple continents | High           | Community    | All adults            | Not reported | 8973               | Self-report                                 | 7                         | 4037           | 0.45               | Moderate     |
| <sup>65</sup> Burke et al (2017)              | US, Europe, Asia                                                      | Multiple continents | High           | Community    | Only older people     | Not reported | 4668               | Self-report                                 | 9                         | 2165           | 0.46               | Moderate     |
| <sup>66</sup> Buurman et al (2016)            | The Netherlands                                                       | Europe              | High           | Hospitals    | Only older people     | 78.2         | 639                | Medical records and administrative database | 35                        | 440            | 0.69               | Moderate     |
| <sup>67</sup> Calderon-Larranaga et al (2017) | Sweden                                                                | Europe              | High           | Primary care | Only older people     | 74.6         | 3363               | Self-report                                 | 60                        | 2980           | 0.89               | Moderate     |
| <sup>68</sup> Camargo-Casas et al (2018)      | Colombia                                                              | South America       | Low or middle  | Community    | Only older people     | 71.1         | 2000               | Self-report                                 | 12                        | 808            | 0.40               | Moderate     |

| Author                                   | Country                                           | Continent           | Country income | Setting      | Study population      | Mean age       | No of participants | Source                                      | No of conditions measured | No of MM cases | Proportion with MM | Risk of bias |
|------------------------------------------|---------------------------------------------------|---------------------|----------------|--------------|-----------------------|----------------|--------------------|---------------------------------------------|---------------------------|----------------|--------------------|--------------|
| <sup>69</sup> Canevelli et al (2019)     | Italy                                             | Europe              | High           | Primary care | Only older people     | 75.1           | 185                | Medical records and administrative database | 18                        | 162            | 0.88               | High         |
| <sup>70</sup> Chamberlain et al (2020)   | USA                                               | North America       | High           | Community    | All adults            | Not reported   | 198941             | Self-report                                 | 21                        | 78527          | 0.39               | Low          |
| <sup>71</sup> Chen et al (2018)          | China                                             | Asia                | Low or middle  | Community    | Only older people     | Not reported   | 30774              | Medical records and administrative database | 33                        | 25101          | 0.82               | Low          |
| <sup>72</sup> Chen et al (2018)          | China                                             | Asia                | Low or middle  | Community    | Middle aged and older | Not reported   | 3737               | Self-report                                 | 16                        | 1722           | 0.46               | Moderate     |
| <sup>73</sup> Cheung et al (2013)        | Hong Kong (SAR of China)                          | Asia                | High           | Community    | Middle aged and older | 71.3           | 1145               | Self-report                                 | 18                        | 654            | 0.57               | Moderate     |
| <sup>74</sup> Chu et al (2018)           | Hong Kong (SAR of China)                          | Asia                | High           | Primary care | Middle aged and older | Not reported   | 382                | Medical records and administrative database | 40                        | 206            | 0.54               | Moderate     |
| <sup>75</sup> Chudasama et al (2019)     | UK                                                | Europe              | High           | Community    | Middle aged and older | Median age:58  | 491939             | Medical records and administrative database | 36                        | 96622          | 0.20               | Moderate     |
| <sup>76</sup> Cimarras-Otal et al (2014) | Spain                                             | Europe              | High           | Community    | All adults            | Not reported   | 22190              | Self-report                                 | 20                        | 7830           | 0.35               | Moderate     |
| <sup>77</sup> Chin et al (2016)          | Hong Kong (SAR of China)                          | Asia                | High           | Primary care | All adults            | Median age: 48 | 9259               | Self-report                                 | 8                         | 2350           | 0.25               | Moderate     |
| <sup>78</sup> Agrawal et al (2016)       | India, China, Russia, Mexico, South Africa, Ghana | Multiple continents | Low or middle  | Community    | All adults            | 57.8           | 40166              | Self-report                                 | 9                         | 9238           | 0.23               | Moderate     |
| <sup>79</sup> Gu et al (2018)            | China                                             | Asia                | Low or middle  | Community    | Only older people     | Not reported   | 411                | Self-report                                 | 13                        | 232            | 0.56               | Moderate     |
| <sup>80</sup> Gunn et al (2012)          | Australia                                         | Australasia         | High           | Primary care | All adults            | 50.89          | 6864               | Self-report                                 | 12                        | 2154           | 0.31               | Moderate     |

| Author                                      | Country   | Continent     | Country income | Setting      | Study population      | Mean age       | No of participants | Source                                      | No of conditions measured | No of MM cases | Proportion with MM | Risk of bias |
|---------------------------------------------|-----------|---------------|----------------|--------------|-----------------------|----------------|--------------------|---------------------------------------------|---------------------------|----------------|--------------------|--------------|
| <sup>81</sup> Han et al (2013)              | USA       | North America | High           | Primary care | Only older people     | 76             | 159                | Medical records and administrative database | 18                        | 117            | 0.74               | High         |
| <sup>82</sup> Hanlon et al (2018)           | UK        | Europe        | High           | Community    | All adults            | Not reported   | 493737             | Medical records and administrative database | 42                        | 161576         | 0.33               | Low          |
| <sup>83</sup> Jantsch et al (2018)          | Brazil    | South America | Low or middle  | Community    | All adults            | 42             | 3092               | Self-report                                 | 11                        | 912            | 0.29               | Moderate     |
| <sup>84</sup> John et al (2003)             | USA       | North America | High           | Community    | Only older people     | 71.3           | 992                | Self-report                                 | 11                        | 732            | 0.74               | High         |
| <sup>85</sup> Johnson-Lawrence et al (2017) | USA       | North America | High           | Community    | All adults            | 49.9           | 115097             | Self-report                                 | 9                         | 27278          | 0.24               | Moderate     |
| <sup>86</sup> Johnston et al (2019)         | UK        | Europe        | High           | Community    | All adults            | 48             | 7184               | Self-report                                 | Not reported              | 388            | 0.05               | Moderate     |
| <sup>87</sup> Jones et al (2016)            | USA       | North America | High           | Community    | Only older people     | Not reported   | 6964               | Self-report                                 | 10                        | 4951           | 0.71               | Moderate     |
| <sup>88</sup> Jovic et al (2016)            | Serbia    | Europe        | Low or middle  | Community    | All adults            | 49.4           | 13103              | Self-report                                 | 13                        | 3522           | 0.27               | Moderate     |
| <sup>89</sup> Juul-Larsen et al (2020)      | Denmark   | Europe        | High           | Hospitals    | Only older people     | Median age: 78 | 369                | Self-report                                 | 34                        | 311            | 0.84               | Moderate     |
| <sup>90</sup> Hudon et al (2008)            | Canada    | North America | High           | Community    | All adults            | Not reported   | 16782              | Self-report                                 | 25                        | 5343           | 0.32               | Low          |
| <sup>91</sup> Hussain et al (2015)          | Indonesia | Asia          | Low or middle  | Community    | Middle aged and older | Not reported   | 9438               | Self-report                                 | 12                        | 3369           | 0.36               | Moderate     |
| <sup>92</sup> Ie et al (2017)               | USA       | North America | High           | Hospitals    | Only older people     | Not reported   | 1084               | Medical records and administrative database | 24                        | 1036           | 0.96               | High         |
| <sup>93</sup> Ishizaki et al (2019)         | Japan     | Asia          | High           | Community    | Only older people     | 76.9           | 2525               | Self-report                                 | 9                         | 1121           | 0.44               | Moderate     |

| Author                                  | Country     | Continent     | Country income | Setting      | Study population      | Mean age     | No of participants | Source                                      | No of conditions measured | No of MM cases | Proportion with MM | Risk of bias |
|-----------------------------------------|-------------|---------------|----------------|--------------|-----------------------|--------------|--------------------|---------------------------------------------|---------------------------|----------------|--------------------|--------------|
| <sup>94</sup> Danon-Hersch et al (2012) | Switzerland | Europe        | High           | Community    | Only older people     | Not reported | 1283               | Self-report                                 | 12                        | 448            | 0.35               | Moderate     |
| <sup>95</sup> de Heer et al (2013)      | USA         | North America | High           | Community    | All adults            | 47.72        | 1002               | Self-report                                 | 19                        | 378            | 0.38               | Moderate     |
| <sup>96</sup> Demirchyan et al (2013)   | Armenia     | Asia          | Low or middle  | Community    | All adults            | 58.8         | 721                | Self-report                                 | Not reported              | 564            | 0.78               | High         |
| <sup>97</sup> Fabbri et al (2015)       | Italy       | Europe        | High           | Community    | Only older people     | 73.6         | 1018               | Self-report                                 | 15                        | 458            | 0.45               | Moderate     |
| <sup>98</sup> Fillenbaum et al (2000)   | USA         | North America | High           | Community    | Only older people     | 73.44        | 4034               | Self-report                                 | 5                         | 1181           | 0.29               | Moderate     |
| <sup>99</sup> Kaneko et al (2019)       | Japan       | Asia          | High           | Community    | Only older people     | Not reported | 253                | Self-report                                 | Not reported              | 135            | 0.53               | Moderate     |
| <sup>100</sup> Kang et al (2017)        | South Korea | Asia          | High           | Primary care | All adults            | 32.2         | 590                | Medical records and administrative database | 14                        | 153            | 0.26               | Moderate     |
| <sup>101</sup> Gandhi et al (2020)      | USA         | North America | High           | Community    | All adults            | Not reported | 9499               | Self-report                                 | 8                         | 3379           | 0.36               | Moderate     |
| <sup>102</sup> Costa et al (2018)       | Brazil      | South America | Low or middle  | Community    | Only older people     | Not reported | 1451               | Self-report                                 | 29                        | 1343           | 0.93               | Moderate     |
| <sup>103</sup> Rizzuto et al (2017)     | Sweden      | Europe        | High           | Community    | Only older people     | Not reported | 1099               | Self-report                                 | 36                        | 774            | 0.70               | Moderate     |
| <sup>104</sup> Dhalwani et al (2017)    | UK          | Europe        | High           | Community    | Middle aged and older | Not reported | 5476               | Self-report                                 | 18                        | 1156           | 0.21               | Moderate     |
| <sup>105</sup> Elixhauser et al (1998)  | USA         | North America | High           | Hospitals    | All adults            | 57.1         | 1779167            | Medical records and administrative database | 30                        | 619150         | 0.35               | Low          |
| <sup>106</sup> Fabbri et al (2015)      | USA         | North America | High           | Hospitals    | Only older people     | 72.3         | 695                | Self-report                                 | 15                        | 440            | 0.63               | Moderate     |

| Author                                | Country                                               | Continent     | Country income | Setting      | Study population      | Mean age     | No of participants | Source                                      | No of conditions measured | No of MM cases | Proportion with MM | Risk of bias |
|---------------------------------------|-------------------------------------------------------|---------------|----------------|--------------|-----------------------|--------------|--------------------|---------------------------------------------|---------------------------|----------------|--------------------|--------------|
| <sup>107</sup> Fortin et al (2014)    | Canada                                                | North America | High           | Community    | Middle aged and older | 57.8         | 1196               | Self-report                                 | 14                        | 599            | 0.50               | Moderate     |
| <sup>108</sup> Fuchs et al (1998)     | Israel                                                | Asia          | High           | Community    | Only older people     | Not reported | 1820               | Self-report                                 | 14                        | 1174           | 0.65               | Moderate     |
| <sup>109</sup> Galenkamp et al (2011) | The Netherlands                                       | Europe        | High           | Community    | Middle aged and older | 69.2         | 2046               | Self-report                                 | 7                         | 876            | 0.43               | High         |
| <sup>110</sup> Galenkamp et al (2016) | Germany, UK, Italy, The Netherlands, Spain and Sweden | Europe        | High           | Community    | Only older people     | 74.2         | 2792               | Self-report                                 | 8                         | 1358           | 0.49               | Moderate     |
| <sup>111</sup> Gamma et al (2001)     | Switzerland                                           | Europe        | High           | Community    | All adults            | Not reported | 407                | Self-report                                 | 14                        | 53             | 0.13               | High         |
| <sup>112</sup> Ge et al (2018)        | Singapore                                             | Asia          | High           | Community    | All adults            | 51.4         | 1940               | Self-report                                 | 17                        | 715            | 0.37               | Moderate     |
| <sup>113</sup> Ge et al (2019)        | Singapore                                             | Asia          | High           | Community    | All adults            | 51.3         | 1932               | Self-report                                 | 17                        | 564            | 0.29               | Moderate     |
| <sup>114</sup> Gould et al (2016)     | USA                                                   | North America | High           | Community    | Only older people     | 74.82        | 4184               | Self-report                                 | 7                         | 2932           | 0.70               | Moderate     |
| <sup>115</sup> Habib et al (2014)     | Lebanon                                               | Asia          | Low or middle  | Community    | All adults            | 46.6         | 2501               | Self-report                                 | Not reported              | 665            | 0.27               | Moderate     |
| <sup>116</sup> Harrison et al (2017)  | Australia                                             | Australasia   | High           | Primary care | All adults            | Not reported | 8707               | Medical records and administrative database | 28                        | 2838           | 0.33               | Moderate     |
| <sup>117</sup> Hayek et al (2017)     | Israel                                                | Asia          | High           | Community    | All adults            | 47.2         | 4325               | Self-report                                 | 10                        | 1579           | 0.37               | Moderate     |
| <sup>118</sup> Henninger et al (2012) | USA                                                   | North America | High           | Community    | Only older people     | 76           | 3212               | Self-report                                 | 9                         | 1753           | 0.55               | Moderate     |
| <sup>119</sup> Hernandez et al (2019) | Ireland                                               | Europe        | High           | Community    | Middle aged and older | Not reported | 6101               | Self-report                                 | 31                        | 4468           | 0.73               | Moderate     |

| Author                                 | Country                                               | Continent           | Country income | Setting   | Study population      | Mean age     | No of participants | Source      | No of conditions measured | No of MM cases | Proportion with MM | Risk of bias |
|----------------------------------------|-------------------------------------------------------|---------------------|----------------|-----------|-----------------------|--------------|--------------------|-------------|---------------------------|----------------|--------------------|--------------|
| <sup>120</sup> Ho et al (2014)         | Singapore                                             | Asia                | High           | Community | Middle aged and older | 66.15        | 1844               | Self-report | 12                        | 830            | 0.45               | Moderate     |
| <sup>121</sup> Khan et al (2019)       | Bangladesh                                            | Asia                | Low or middle  | Community | All adults            | 58.6         | 12338              | Self-report | 6                         | 1031           | 0.08               | Low          |
| <sup>122</sup> Kiliari et al (2013)    | Cyprus                                                | Europe              | High           | Community | All adults            | 53           | 465                | Self-report | Not reported              | 132            | 0.28               | Moderate     |
| <sup>123</sup> King et al (2018)       | USA                                                   | North America       | High           | Community | All adults            | Not reported | 5541               | Self-report | 11                        | 3342           | 0.60               | Moderate     |
| <sup>124</sup> Kingston et al (2018)   | UK                                                    | Europe              | High           | Community | All adults            | Not reported | 9723900            | Self-report | 12                        | 5250906        | 0.54               | High         |
| <sup>125</sup> Koyanagi et al (2018)   | China, Ghana, India, Mexico, Russia, and South Africa | Multiple continents | Low or middle  | Community | Middle aged and older | 62.1         | 32715              | Self-report | 10                        | 16324          | 0.50               | Moderate     |
| <sup>126</sup> Kriegsman et al (2004)  | The Netherlands                                       | Europe              | High           | Community | Middle aged and older | 69.2         | 2489               | Self-report | 7                         | 519            | 0.21               | Moderate     |
| <sup>127</sup> Kristensen et al (2019) | Germany                                               | Europe              | High           | Community | Middle aged and older | 63.47        | 19605              | Self-report | 13                        | 12600          | 0.64               | Moderate     |
| <sup>128</sup> Kristensen et al (2019) | Germany                                               | Europe              | High           | Community | Middle aged and older | 64.37        | 7604               | Self-report | 13                        | 5140           | 0.68               | Moderate     |
| <sup>129</sup> Kunna et al (2017)      | China, Ghana                                          | Multiple continents | Low or middle  | Community | Middle aged and older | Not reported | 15864              | Self-report | 7                         | 4731           | 0.30               | Low          |
| <sup>130</sup> Kuwornu et al (2014)    | Canada                                                | North America       | High           | Community | All adults            | 51.05        | 3284               | Self-report | 15                        | 1143           | 0.35               | Moderate     |
| <sup>131</sup> Lai et al (2019)        | Hong Kong (SAR of China)                              | Asia                | High           | Community | All adults            | Not reported | 69636              | Self-report | 14                        | 3898           | 0.06               | Moderate     |
| <sup>132</sup> Lai et al (2018)        | Hong Kong (SAR of China)                              | Asia                | High           | Community | All adults            | Not reported | 300                | Self-report | 11                        | 48             | 0.16               | Moderate     |
| <sup>133</sup> Laires et al (2019)     | Portugal                                              | Europe              | High           | Community | All adults            | Not reported | 15196              | Self-report | 13                        | 6671           | 0.44               | Moderate     |

| Author                                          | Country                     | Continent     | Country income | Setting      | Study population      | Mean age     | No of participants | Source                                      | No of conditions measured | No of MM cases | Proportion with MM | Risk of bias |
|-------------------------------------------------|-----------------------------|---------------|----------------|--------------|-----------------------|--------------|--------------------|---------------------------------------------|---------------------------|----------------|--------------------|--------------|
| <sup>134</sup> Lang et al (2015)                | USA                         | North America | High           | Community    | Middle aged and older | 53.4         | 3058               | Self-report                                 | 6                         | 948            | 0.31               | Moderate     |
| <sup>135</sup> Le Cossec et al (2016)           | France                      | Europe        | High           | Community    | Middle aged and older | 70           | 15325              | Self-report                                 | 4                         | 3528           | 0.23               | Moderate     |
| <sup>136</sup> Lee et al (2007)                 | USA                         | North America | High           | Hospitals    | Middle aged and older | Not reported | 741847             | Medical records and administrative database | 11                        | 302792         | 0.41               | Low          |
| <sup>137</sup> Lee et al (2018)                 | Taiwan                      | Asia          | High           | Community    | Only older people     | Not reported | 20898              | Medical records and administrative database | Not reported              | 4234           | 0.20               | High         |
| <sup>138</sup> Li et al (2016)                  | UK                          | Europe        | High           | Primary care | All adults            | Not reported | 27806              | Self-report                                 | 12                        | 10332          | 0.37               | Moderate     |
| <sup>139</sup> Li et al (2019)                  | USA                         | North America | High           | Community    | Middle aged and older | 67.4         | 14996              | Self-report                                 | 8                         | 9805           | 0.65               | Moderate     |
| <sup>140</sup> Lujic et al (2017)               | Australia                   | Australasia   | High           | Community    | Middle aged and older | 70.2         | 90352              | Self-report                                 | 8                         | 33792          | 0.37               | Moderate     |
| <sup>141</sup> Lupianez-Villanueva et al (2018) | 14 European countries       | Europe        | High           | Community    | All adults            | Not reported | 14000              | Self-report                                 | 13                        | 3416           | 0.24               | Moderate     |
| <sup>142</sup> Zhou et al (2018)                | Bangladesh, India and China | Asia          | Low or middle  | Community    | All adults            | Not reported | 18696              | Self-report                                 | 9                         | 3512           | 0.19               | Moderate     |
| <sup>143</sup> Zhang et al (2019)               | China                       | Asia          | Low or middle  | Community    | Only older people     | 70.5         | 11707              | Self-report                                 | 11                        | 5104           | 0.44               | Moderate     |
| <sup>144</sup> Wong et al (2010)                | Canada                      | North America | High           | Community    | Only older people     | Not reported | 740                | Self-report                                 | 7                         | 489            | 0.66               | Moderate     |
| <sup>145</sup> Weimann et al (2016)             | South Africa                | Africa        | Low or middle  | Community    | All adults            | 34           | 18526              | Self-report                                 | 4                         | 506            | 0.027              | Moderate     |
| <sup>146</sup> Wang et al (2017)                | Australia                   | Australasia   | High           | Community    | All adults            | 44           | 8820               | Self-report                                 | 8                         | 2539           | 0.29               | Moderate     |
| <sup>147</sup> Wang et al (2019)                | South Africa                | Africa        | Low or middle  | Community    | Only older people     | Not reported | 2627               | Self-report                                 | 5                         | 439            | 0.17               | Moderate     |

| Author                                  | Country               | Continent     | Country income | Setting      | Study population      | Mean age     | No of participants | Source                                      | No of conditions measured | No of MM cases | Proportion with MM | Risk of bias |
|-----------------------------------------|-----------------------|---------------|----------------|--------------|-----------------------|--------------|--------------------|---------------------------------------------|---------------------------|----------------|--------------------|--------------|
| <sup>148</sup> Wade et al (2019)        | New Zealand           | Australasia   | High           | Community    | All adults            | 59.05        | 7654               | Self-report                                 | 12                        | 2786           | 0.36               | Moderate     |
| <sup>149</sup> Maciejewski et al (2019) | USA                   | North America | High           | Community    | Only older people     | 77.1         | 20124230           | Medical records and administrative database | 19                        | 14425446       | 0.72               | Moderate     |
| <sup>150</sup> Marengoni et al (2016)   | Sweden                | Europe        | High           | Community    | Only older people     | 74.4         | 3155               | Medical records and administrative database | 14                        | 1654           | 0.52               | Moderate     |
| <sup>151</sup> Marengoni et al (2009)   | Sweden                | Europe        | High           | Community    | Only older people     | Not reported | 1099               | Self-report                                 | 22                        | 575            | 0.52               | Moderate     |
| <sup>152</sup> Marques et al (2018)     | 13 European countries | Europe        | High           | Community    | All adults            | 50.2         | 32931              | Self-report                                 | 6                         | 7113           | 0.22               | Moderate     |
| <sup>153</sup> Mavaddat et al (2014)    | UK                    | Europe        | High           | Primary care | Middle aged and older | 58.7         | 11439              | Self-report                                 | 6                         | 1006           | 0.09               | Moderate     |
| <sup>154</sup> McDaid et al (2013)      | Ireland               | Europe        | High           | Community    | Middle aged and older | Not reported | 6018               | Self-report                                 | 8                         | 733            | 0.12               | High         |
| <sup>155</sup> Melis et al (2014)       | Sweden                | Europe        | High           | Hospitals    | Only older people     | 83.75        | 390                | Medical records and administrative database | 39                        | 213            | 0.55               | Moderate     |
| <sup>156</sup> Min et al (2007)         | USA                   | North America | High           | Community    | Only older people     | 81           | 372                | Self-report                                 | 9                         | 230            | 0.62               | High         |
| <sup>157</sup> Momtaz et al (2010)      | Malaysia              | Asia          | High           | Community    | Only older people     | 69.26        | 385                | Self-report                                 | 16                        | 165            | 0.43               | Moderate     |
| <sup>158</sup> Mondor et al (2018)      | Canada                | North America | High           | Community    | All adults            | Not reported | 27195              | Medical records and administrative database | 17                        | 11390          | 0.42               | Moderate     |
| <sup>159</sup> Muggah et al (2012)      | Canada                | North America | High           | Community    | All adults            | Not reported | 28450000           | Medical records and administrative database | 9                         | 4523550        | 0.16               | Moderate     |
| <sup>160</sup> Nagel et al (2008)       | Germany               | Europe        | High           | Community    | Middle aged and older | 56.5         | 13781              | Self-report                                 | 15                        | 9275           | 0.67               | Moderate     |

| Author                                   | Country      | Continent     | Country income | Setting      | Study population      | Mean age       | No of participants | Source                                      | No of conditions measured | No of MM cases | Proportion with MM | Risk of bias |
|------------------------------------------|--------------|---------------|----------------|--------------|-----------------------|----------------|--------------------|---------------------------------------------|---------------------------|----------------|--------------------|--------------|
| <sup>161</sup> Niedzwiedz et al (2019)   | USA          | North America | High           | Community    | Middle aged and older | 67.2           | 2272               | Self-report                                 | 8                         | 1491           | 0.66               | Moderate     |
| <sup>162</sup> Nunes et al (2016)        | Brazil       | South America | Low or middle  | Community    | All adults            | 45.75          | 2927               | Self-report                                 | 11                        | 852            | 0.29               | Moderate     |
| <sup>163</sup> Nunes et al (2017)        | Brazil       | South America | Low or middle  | Community    | All adults            | 43.7           | 60202              | Self-report                                 | 22                        | 13365          | 0.22               | Moderate     |
| <sup>164</sup> Nunes et al (2015)        | Brazil       | South America | Low or middle  | Community    | Only older people     | Not reported   | 1593               | Self-report                                 | 17                        | 1295           | 0.81               | Moderate     |
| <sup>165</sup> Olaya et al (2017)        | Spain        | Europe        | High           | Community    | Only older people     | 71.75          | 2113               | Self-report                                 | 7                         | 1088           | 0.51               | Moderate     |
| <sup>166</sup> Olivares et al (2017)     | Argentina    | South America | High           | Community    | All adults            | 43             | 1044               | Self-report                                 | Not reported              | 346            | 0.33               | Moderate     |
| <sup>167</sup> Park et al (2018)         | South Korea  | Asia          | High           | Community    | Middle aged and older | 62.7           | 5996               | Self-report                                 | 25                        | 1607           | 0.27               | Moderate     |
| <sup>168</sup> Patel et al (2006)        | Mexico       | South America | Low or middle  | Community    | Middle aged and older | 73             | 7852               | Self-report                                 | 5                         | 1833           | 0.23               | Moderate     |
| <sup>169</sup> Pati et al (2016)         | India        | Asia          | Low or middle  | Community    | All adults            | 44.96          | 103                | Self-report                                 | 18                        | 24             | 0.23               | Moderate     |
| <sup>170</sup> Pati et al (2019)         | India        | Asia          | Low or middle  | Primary care | All adults            | 44             | 1649               | Self-report                                 | 21                        | 567            | 0.34               | Moderate     |
| <sup>171</sup> Payne et al (2013)        | UK           | Europe        | High           | Primary care | All adults            | 49             | 180815             | Medical records and administrative database | 40                        | 54945          | 0.30               | Moderate     |
| <sup>172</sup> Perez et al (2020)        | Sweden       | Europe        | High           | Community    | Only older people     | 72.8           | 2596               | Self-report                                 | 60                        | 2213           | 0.85               | Moderate     |
| <sup>173</sup> Petersen et al (2019)     | South Africa | Africa        | Low or middle  | Primary care | All adults            | Not reported   | 2549               | Self-report                                 | Not reported              | 893            | 0.35               | Moderate     |
| <sup>174</sup> Pfortmueller et al (2013) | Switzerland  | Europe        | High           | Hospitals    | All adults            | Median age: 28 | 3170               | Medical records and administrative database | 18                        | 1183           | 0.37               | High         |

| Author                                | Country                                                                                            | Continent     | Country income | Setting      | Study population      | Mean age      | No of participants | Source                                      | No of conditions measured | No of MM cases | Proportion with MM | Risk of bias |
|---------------------------------------|----------------------------------------------------------------------------------------------------|---------------|----------------|--------------|-----------------------|---------------|--------------------|---------------------------------------------|---------------------------|----------------|--------------------|--------------|
| <sup>175</sup> Pressley et al (1999)  | USA                                                                                                | North America | High           | Hospitals    | Only older people     | Not reported  | 5934               | Medical records and administrative database | Not reported              | 3534           | 0.60               | Moderate     |
| <sup>176</sup> Prior et al (2016)     | Denmark                                                                                            | Europe        | High           | Community    | All adults            | Not reported  | 118410             | Self-report                                 | 39                        | 33937          | 0.29               | Moderate     |
| <sup>177</sup> Ribeiro et al (2018)   | Brazil                                                                                             | South America | High           | Community    | Only older people     | 70            | 820                | Self-report                                 | 8                         | 270            | 0.33               | Moderate     |
| <sup>178</sup> Ruel et al (2014)      | Australia                                                                                          | Australasia   | High           | Community    | All adults            | 50            | 1854               | Self-report                                 | 8                         | 585            | 0.32               | Moderate     |
| <sup>179</sup> Ruel et al (2014)      | China                                                                                              | Asia          | Low or middle  | Community    | All adults            | 49            | 1020               | Self-report                                 | 11                        | 346            | 0.34               | Moderate     |
| <sup>180</sup> Ryan et al (2018)      | Ireland                                                                                            | Europe        | High           | Community    | Middle aged and older | Not reported  | 4823               | Self-report                                 | 16                        | 2588           | 0.54               | Moderate     |
| <sup>181</sup> Schmidt et al (2016)   | Austria, Belgium, Denmark, France, Germany, Italy, the Netherlands, Spain, Sweden, and Switzerland | Europe        | High           | Community    | Only older people     | Not reported  | 56609              | Self-report                                 | 11                        | 13794          | 0.24               | Moderate     |
| <sup>182</sup> Schottker et al (2016) | Germany                                                                                            | Europe        | High           | Primary care | Middle aged and older | Median age:70 | 2547               | Medical records and administrative database | 14                        | 251            | 0.10               | Moderate     |
| <sup>183</sup> Seo et al (2017)       | South Korea                                                                                        | Asia          | High           | Community    | Middle aged and older | Not reported  | 156747             | Self-report                                 | 15                        | 42006          | 0.27               | Moderate     |
| <sup>184</sup> She et al (2019)       | China                                                                                              | Asia          | Low or middle  | Hospitals    | Only older people     | 68.9          | 1497               | Self-report                                 | 22                        | 1255           | 0.84               | Moderate     |
| <sup>185</sup> Singh et al (2019)     | India                                                                                              | Asia          | Low or middle  | Community    | All adults            | 41            | 16287              | Self-report                                 | 5                         | 1531           | 0.09               | Moderate     |
| <sup>186</sup> Stepanova et al (2015) | USA                                                                                                | North America | High           | Community    | All adults            | 34.7          | 26225              | Self-report                                 | 13                        | 9992           | 0.38               | High         |
| <sup>187</sup> Stickley et al (2020)  | USA                                                                                                | North America | High           | Community    | All adults            | 44.9          | 15311              | Self-report                                 | 9                         | 3996           | 0.26               | High         |

| Author                                  | Country                                               | Continent           | Country income | Setting      | Study population      | Mean age       | No of participants | Source                                      | No of conditions measured | No of MM cases | Proportion with MM | Risk of bias |
|-----------------------------------------|-------------------------------------------------------|---------------------|----------------|--------------|-----------------------|----------------|--------------------|---------------------------------------------|---------------------------|----------------|--------------------|--------------|
| <sup>188</sup> Streit et al (2014)      | Switzerland                                           | Europe              | High           | Primary care | Middle aged and older | 63.5           | 1002               | Medical records and administrative database | 17                        | 676            | 0.67               | Moderate     |
| <sup>189</sup> Stubbs et al (2018)      | China, Ghana, India, Mexico, Russia, South Africa     | Multiple continents | Low or middle  | Community    | Middle aged and older | 62.4           | 34129              | Self-report                                 | 13                        | 19317          | 0.57               | Moderate     |
| <sup>190</sup> Su et al (2016)          | China                                                 | Asia                | Low or middle  | Community    | Only older people     | Not reported   | 2058               | Self-report                                 | 10                        | 1012           | 0.49               | Moderate     |
| <sup>191</sup> Sundstrup et al (2017)   | USA                                                   | North America       | High           | Community    | All adults            | 43.5           | 10427              | Self-report                                 | 8                         | 2489           | 0.24               | High         |
| <sup>192</sup> Takahashi et al (2016)   | USA                                                   | North America       | High           | Hospitals    | All adults            | 57             | 6402               | Medical records and administrative database | Not reported              | 3140           | 0.49               | High         |
| <sup>193</sup> Tinetti et al (2011)     | USA                                                   | North America       | High           | Community    | Only older people     | 72.6           | 5298               | Self-report                                 | 5                         | 1200           | 0.23               | High         |
| <sup>194</sup> Troelstra et al (2020)   | The Netherlands                                       | Europe              | High           | Community    | All adults            | Not reported   | 604                | Self-report                                 | 26                        | 321            | 0.53               | High         |
| <sup>195</sup> van Zon et al (2020)     | USA                                                   | North America       | High           | Community    | Middle aged and older | 53.8           | 10719              | Self-report                                 | 8                         | 2390           | 0.22               | Moderate     |
| <sup>196</sup> Vancampfort et al (2017) | China, Ghana, India, Mexico, Russia, and South Africa | Multiple continents | Low or middle  | Community    | All adults            | Median age: 62 | 32585              | Self-report                                 | 11                        | 14524          | 0.45               | Moderate     |
| <sup>197</sup> Vassilaki et al (2015)   | USA                                                   | North America       | High           | Primary care | Only older people     | 78.5           | 2176               | Medical records and administrative database | 17                        | 1884           | 0.87               | Moderate     |
| <sup>198</sup> Vassilaki et al (2016)   | USA                                                   | North America       | High           | Primary care | Only older people     | 79             | 1449               | Medical records and administrative database | 17                        | 1237           | 0.85               | Moderate     |
| <sup>199</sup> Villarreal et al (2015)  | Panama                                                | South America       | High           | Primary care | Only older people     | 78.2           | 304                | Self-report                                 | 7                         | 227            | 0.75               | Moderate     |
| <sup>200</sup> Violan et al (2019)      | Spain                                                 | Europe              | High           | Primary care | Only older people     | 75.4           | 916619             | Medical records and                         | 60                        | 853085         | 0.93               | Moderate     |

| Author                                   | Country         | Continent     | Country income | Setting      | Study population      | Mean age     | No of participants | Source                                      | No of conditions measured | No of MM cases | Proportion with MM | Risk of bias |
|------------------------------------------|-----------------|---------------|----------------|--------------|-----------------------|--------------|--------------------|---------------------------------------------|---------------------------|----------------|--------------------|--------------|
|                                          |                 |               |                |              |                       |              |                    | administrative database                     |                           |                |                    |              |
| <sup>201</sup> von Strauss et al (2000)  | Sweden          | Europe        | High           | Community    | Only older people     | Not reported | 502                | Self-report                                 | 15                        | 155            | 0.31               | Moderate     |
| <sup>202</sup> Vos et al (2013)          | The Netherlands | Europe        | High           | Community    | Only older people     | 71.9         | 315                | Self-report                                 | 21                        | 202            | 0.64               | Moderate     |
| <sup>203</sup> Vu et al (2019)           | Vietnam         | Asia          | Low or middle  | Hospitals    | Only older people     | 71.9         | 405                | Medical records and administrative database | Not reported              | 146            | 0.36               | High         |
| <sup>204</sup> Wang et al (2018)         | USA             | North America | High           | Community    | All adults            | 47           | 3086               | Self-report                                 | 20                        | 1109           | 0.36               | Moderate     |
| <sup>205</sup> Wang et al (2017)         | China           | Asia          | Low or middle  | Community    | Only older people     | 69.24        | 2705               | Self-report                                 | 17                        | 1230           | 0.45               | Moderate     |
| <sup>206</sup> Wijers et al (2019)       | Spain           | Europe        | High           | Community    | Middle aged and older | 74.2         | 707                | Self-report                                 | 21                        | 491            | 0.69               | Moderate     |
| <sup>207</sup> Williams et al (2016)     | USA             | North America | High           | Community    | All adults            | Not reported | 23789              | Self-report                                 | 9                         | 9213           | 0.39               | Moderate     |
| <sup>208</sup> Woldeamayrat et al (2018) | Ethiopia        | Africa        | Low or middle  | Primary care | All adults            | Not reported | 411                | Self-report                                 | 18                        | 73             | 0.18               | Moderate     |
| <sup>209</sup> Yao et al (2020)          | China           | Asia          | Low or middle  | Community    | Middle aged and older | 57.7         | 10084              | Self-report                                 | 15                        | 3243           | 0.32               | Moderate     |
| <sup>210</sup> Yorke et al (2017)        | USA             | North America | High           | Community    | Middle aged and older | 66.6         | 5877               | Self-report                                 | 7                         | 3391           | 0.58               | Moderate     |
| <sup>211</sup> You et al (2019)          | China           | Asia          | Low or middle  | Community    | Only older people     | 72           | 5296               | Self-report                                 | 27                        | 2201           | 0.42               | Moderate     |
| <sup>212</sup> Zhang et al (2020)        | China           | Asia          | Low or middle  | Community    | Only older people     | 74.14        | 4348               | Self-report                                 | 15                        | 2338           | 0.54               | Moderate     |
| <sup>213</sup> Khanam et al (2011)       | Bangladesh      | Asia          | Low or middle  | Community    | Only older people     | 69.5         | 452                | Medical records and administrative database | 9                         | 243            | 0.54               | Moderate     |

| Author                              | Country                  | Continent     | Country income | Setting      | Study population | Mean age     | No of participants | Source                                      | No of conditions measured | No of MM cases | Proportion with MM | Risk of bias |
|-------------------------------------|--------------------------|---------------|----------------|--------------|------------------|--------------|--------------------|---------------------------------------------|---------------------------|----------------|--------------------|--------------|
| <sup>214</sup> Cornell et al (2009) | USA                      | North America | High           | Primary care | All adults       | 62.4         | 1645314            | Medical records and administrative database | 45                        | 1327382        | 0.81               | Moderate     |
| <sup>215</sup> Cassell et al (2018) | UK                       | Europe        | High           | Primary care | All adults       | Not reported | 403985             | Medical records and administrative database | 36                        | 109884         | 0.27               | Moderate     |
| <sup>216</sup> Wong et al (2019)    | Hong Kong (SAR of China) | Asia          | High           | Community    | All adults       | 45.67        | 1014               | Self-report                                 | 5                         | 124            | 0.12               | Moderate     |
| <sup>217</sup> Puth et al (2017)    | Germany                  | Europe        | High           | Community    | All adults       | Not reported | 19294              | Self-report                                 | 17                        | 7640           | 0.40               | Moderate     |

MM: Multimorbidity. No of participants is the total number of participants in the denominator for estimating prevalence in a study (which could be a subset in some included studies)

**Table S5: Associations between predictors**

|                         | <b>Mean age (lm)<br/>Unadjusted coefficient<br/>estimates</b> | <b>No of conditions (nb)<br/>Unadjusted incident<br/>rate ratio</b> |
|-------------------------|---------------------------------------------------------------|---------------------------------------------------------------------|
| <b>Mean age</b>         |                                                               | 1.0 (1.0-1.0)                                                       |
| <b>Source</b>           |                                                               |                                                                     |
| Self-report             | 59.7 (57.1-62.3) (intercept)                                  | Ref                                                                 |
| Database                | 7.0 (1.5-12.5)*                                               | 1.8 (1.5-2.2)***                                                    |
| <b>Continent</b>        |                                                               |                                                                     |
| Europe                  | 66.8 (62.8-70.9) (intercept)                                  | Ref                                                                 |
| North America           | -7.0 (-12.8 to -1.1)*                                         | 0.6 (0.5-0.8)***                                                    |
| Australasia             | -8.0 (-17.5-1.6)                                              | 0.8 (0.6-1.1)                                                       |
| Asia                    | -8.4 (-14.6 to -2.2)**                                        | 0.6 (0.5-0.8)***                                                    |
| South America           | -8.5 (-18.0-1.1)                                              | 0.6 (0.4-0.9)**                                                     |
| Africa                  | -32.8 (-57.8 to -8.0)**                                       | 0.4 (0.2-0.8)*                                                      |
| Multiple continents     | -7.6 (-18.3-3.2)                                              | 0.5 (0.3-0.7)***                                                    |
| <b>Setting</b>          |                                                               |                                                                     |
| Community               | 59.8 (57.2-62.5) (intercept)                                  | Ref                                                                 |
| Primary care            | 3.5 (-2.5-9.6)                                                | 1.7 (1.4-2.1)***                                                    |
| Hospitals               | 10.2 (1.5-19.0)*                                              | 1.8 (1.3-2.4)***                                                    |
| <b>Study population</b> |                                                               |                                                                     |
| All adults              | 48.3 (46.6-50.0) (intercept)                                  | Ref                                                                 |
| Middle-aged and older   | 15.4 (12.7-18.0)***                                           | 0.9 (0.7-1.1)                                                       |
| Only older people       | 26.2 (23.7-28.7)***                                           | 1.2 (0.9-1.4)                                                       |

\* $<0.05$  \*\* $<0.01$  \*\*\* $<0.001$ 

Ref: Reference category. lm: Linear regression. nb: Negative binomial regression

**Table S6: Risk of bias assessment of included studies**

| Author                                     | Selection bias | Study design | Confounders | Blinding | Data collection method | Withdrawals and dropouts | Publication bias | Conflict of interest | Overall rating | Reporting of MM measure and definition |
|--------------------------------------------|----------------|--------------|-------------|----------|------------------------|--------------------------|------------------|----------------------|----------------|----------------------------------------|
| <sup>25.</sup> Aarts et al (2012)          | Moderate       | Moderate     | Moderate    | High     | Low                    | Low                      | Moderate         | Low                  | Moderate       | Yes                                    |
| <sup>26.</sup> Aarts et al (2011)          | Low            | High         | Moderate    | High     | Moderate               | Moderate                 | Moderate         | Low                  | Moderate       | No                                     |
| <sup>27.</sup> Aarts et al (2011)          | Moderate       | Moderate     | Moderate    | High     | Low                    | Low                      | Moderate         | Low                  | Moderate       | Yes                                    |
| <sup>28.</sup> Abizanda et al (2014)       | Moderate       | Moderate     | Moderate    | High     | Moderate               | Moderate                 | Moderate         | Low                  | Moderate       | Yes                                    |
| <sup>29.</sup> Agborsangaya et al (2012)   | Moderate       | Moderate     | Moderate    | High     | Moderate               | High                     | Moderate         | Unclear              | Moderate       | Yes                                    |
| <sup>30.</sup> Agborsangaya et al (2013)   | Moderate       | Moderate     | Moderate    | High     | Moderate               | High                     | Moderate         | Unclear              | Moderate       | Yes                                    |
| <sup>31.</sup> Agborsangaya et al (2014)   | Moderate       | Moderate     | Moderate    | High     | Moderate               | High                     | Moderate         | Low                  | Moderate       | Yes                                    |
| <sup>32.</sup> Ahrenfeldt et al (2019)     | Low            | Moderate     | Moderate    | High     | Low                    | High                     | Moderate         | Low                  | Moderate       | No                                     |
| <sup>33.</sup> Alimohammadian et al (2017) | Low            | Moderate     | Moderate    | High     | Low                    | High                     | Moderate         | Low                  | Moderate       | Yes                                    |
| <sup>34.</sup> Angst et al (2002)          | Moderate       | Moderate     | Moderate    | High     | Low                    | High                     | High             | Unclear              | High           | No                                     |
| <sup>35.</sup> Appa et al (2014)           | Moderate       | Moderate     | Moderate    | High     | Moderate               | High                     | Moderate         | Low                  | Moderate       | Yes                                    |
| <sup>36.</sup> Adams et al (2017)          | Low            | Moderate     | Moderate    | High     | Moderate               | High                     | Moderate         | Low                  | Moderate       | Yes                                    |
| <sup>37.</sup> Ahmadi et al (2016)         | Low            | Moderate     | Moderate    | High     | Moderate               | High                     | Moderate         | Unclear              | Moderate       | Yes                                    |
| <sup>38.</sup> Amaral et al (2018)         | High           | Moderate     | Moderate    | High     | Moderate               | High                     | Moderate         | Unclear              | Moderate       | Yes                                    |

| Author                                  | Selection bias | Study design | Confounders | Blinding | Data collection method | Withdrawals and dropouts | Publication bias | Conflict of interest | Overall rating | Reporting of MM measure and definition |
|-----------------------------------------|----------------|--------------|-------------|----------|------------------------|--------------------------|------------------|----------------------|----------------|----------------------------------------|
| <sup>39.</sup> An et al (2016)          | Low            | Moderate     | Moderate    | High     | Moderate               | High                     | Moderate         | Unclear              | Moderate       | Yes                                    |
| <sup>40.</sup> Araujo et al (2018)      | Low            | Moderate     | Low         | High     | Moderate               | High                     | Moderate         | Low                  | Moderate       | Yes                                    |
| <sup>41.</sup> Arnold-Reed et al (2018) | Moderate       | Moderate     | Moderate    | High     | Moderate               | High                     | Moderate         | Low                  | Moderate       | Yes                                    |
| <sup>42.</sup> Arokiasamy et al (2015)  | Low            | Moderate     | Moderate    | High     | Moderate               | High                     | Moderate         | Low                  | Moderate       | Yes                                    |
| <sup>43.</sup> Sinnige et al (2015)     | Low            | Moderate     | Moderate    | High     | Low                    | Low                      | Moderate         | Low                  | Moderate       | Yes                                    |
| <sup>44.</sup> Zemedikun et al (2018)   | Low            | Moderate     | Moderate    | High     | Moderate               | High                     | Moderate         | Low                  | Moderate       | Yes                                    |
| <sup>45.</sup> Wensing et al (2001)     | Moderate       | Moderate     | Moderate    | High     | Moderate               | Moderate                 | Moderate         | Unclear              | Moderate       | Yes                                    |
| <sup>46.</sup> Mounce et al (2018)      | Low            | Moderate     | Moderate    | High     | Moderate               | High                     | Moderate         | Low                  | Moderate       | Yes                                    |
| <sup>47.</sup> Taylor et al (2010)      | Low            | Moderate     | Moderate    | High     | Low                    | Low                      | Moderate         | Low                  | Low            | Yes                                    |
| <sup>48.</sup> Vancampfort et al (2019) | Low            | Moderate     | Moderate    | High     | Moderate               | High                     | Moderate         | Low                  | Moderate       | Yes                                    |
| <sup>49.</sup> Vancampfort et al (2018) | Low            | Moderate     | Moderate    | High     | Moderate               | High                     | Moderate         | Low                  | Moderate       | Yes                                    |
| <sup>50.</sup> Aubert et al (2016)      | Moderate       | Moderate     | Moderate    | High     | Moderate               | Low                      | Moderate         | Low                  | Moderate       | Yes                                    |
| <sup>51.</sup> Autenrieth et al (2013)  | Moderate       | Moderate     | Moderate    | High     | Moderate               | High                     | Moderate         | Low                  | Moderate       | Yes                                    |
| <sup>52.</sup> Bahler et al (2015)      | Low            | Moderate     | Moderate    | High     | Moderate               | Low                      | Moderate         | Low                  | Moderate       | Yes                                    |
| <sup>53.</sup> Vancampfort et al (2017) | Low            | Moderate     | Moderate    | High     | Moderate               | High                     | Moderate         | Unclear              | Moderate       | Yes                                    |

| Author                                         | Selection bias | Study design | Confounders | Blinding | Data collection method | Withdrawals and dropouts | Publication bias | Conflict of interest | Overall rating | Reporting of MM measure and definition |
|------------------------------------------------|----------------|--------------|-------------|----------|------------------------|--------------------------|------------------|----------------------|----------------|----------------------------------------|
| <sup>54.</sup> Banjare et al (2014)            | Moderate       | Moderate     | Moderate    | High     | Moderate               | High                     | Moderate         | Unclear              | Moderate       | Yes                                    |
| <sup>55.</sup> Barra et al (2015)              | Moderate       | Moderate     | High        | High     | Moderate               | High                     | Moderate         | Unclear              | Moderate       | No                                     |
| <sup>56.</sup> Bernard et al (2016)            | High           | Moderate     | High        | High     | Moderate               | Low                      | Moderate         | Low                  | High           | No                                     |
| <sup>57.</sup> Biswas et al (2019)             | Low            | Moderate     | Moderate    | High     | Moderate               | High                     | Moderate         | Low                  | Moderate       | No                                     |
| <sup>58.</sup> Blakemore et al (2016)          | Moderate       | Moderate     | Moderate    | High     | Moderate               | High                     | Moderate         | Low                  | Moderate       | No                                     |
| <sup>59.</sup> Blyth et al (2008)              | Moderate       | Moderate     | Moderate    | High     | Moderate               | High                     | Moderate         | Low                  | Moderate       | Yes                                    |
| <sup>60.</sup> Bowling et al (2019)            | Low            | Moderate     | Moderate    | High     | Moderate               | Low                      | Moderate         | Low                  | Moderate       | Yes                                    |
| <sup>61.</sup> Britt et al (2008)              | Low            | Moderate     | High        | High     | Moderate               | Moderate                 | Moderate         | Low                  | Moderate       | Yes                                    |
| <sup>62.</sup> Broeiro-Goncalves (2019)        | Low            | Moderate     | High        | High     | Moderate               | Moderate                 | Moderate         | Low                  | Moderate       | Yes                                    |
| <sup>63.</sup> Bruce et al (2010)              | High           | Moderate     | Moderate    | High     | Low                    | High                     | Moderate         | Unclear              | High           | No                                     |
| <sup>64.</sup> Burgers et al (2010)            | Low            | Moderate     | High        | High     | Moderate               | Low                      | Moderate         | Low                  | Moderate       | Yes                                    |
| <sup>65.</sup> Burke et al (2017)              | Moderate       | Moderate     | Moderate    | High     | Moderate               | High                     | Moderate         | Low                  | Moderate       | Yes                                    |
| <sup>66.</sup> Buurman et al (2016)            | Moderate       | Moderate     | Moderate    | High     | Moderate               | High                     | Moderate         | Low                  | Moderate       | Yes                                    |
| <sup>67.</sup> Calderon-Larranaga et al (2017) | Moderate       | Moderate     | Moderate    | High     | Low                    | Low                      | Moderate         | Low                  | Moderate       | Yes                                    |
| <sup>68.</sup> Camargo-Casas et al (2018)      | Moderate       | Moderate     | Moderate    | High     | Moderate               | High                     | Moderate         | Unclear              | Moderate       | Yes                                    |

| Author                                    | Selection bias | Study design | Confounders | Blinding | Data collection method | Withdrawals and dropouts | Publication bias | Conflict of interest | Overall rating | Reporting of MM measure and definition |
|-------------------------------------------|----------------|--------------|-------------|----------|------------------------|--------------------------|------------------|----------------------|----------------|----------------------------------------|
| <sup>69.</sup> Canevelli et al (2019)     | High           | High         | High        | High     | Moderate               | High                     | Moderate         | Low                  | High           | Yes                                    |
| <sup>70.</sup> Chamberlain et al (2020)   | Low            | Moderate     | Moderate    | High     | Low                    | Low                      | Moderate         | Low                  | Low            | Yes                                    |
| <sup>71.</sup> Chen et al (2018)          | Low            | Moderate     | High        | High     | Low                    | Low                      | Moderate         | Low                  | Low            | Yes                                    |
| <sup>72.</sup> Chen et al (2018)          | Low            | Moderate     | Moderate    | High     | Moderate               | High                     | Moderate         | Low                  | Moderate       | Yes                                    |
| <sup>73.</sup> Cheung et al (2013)        | Moderate       | Moderate     | Moderate    | High     | Moderate               | High                     | Moderate         | Unclear              | Moderate       | Yes                                    |
| <sup>74.</sup> Chu et al (2018)           | Low            | Moderate     | Moderate    | High     | Moderate               | Moderate                 | Moderate         | Low                  | Moderate       | Yes                                    |
| <sup>75.</sup> Chudasama et al (2019)     | Moderate       | Moderate     | Low         | High     | Moderate               | Low                      | Moderate         | Low                  | Moderate       | Yes                                    |
| <sup>76.</sup> Cimarras-Otal et al (2014) | Low            | Moderate     | Moderate    | High     | Moderate               | High                     | Moderate         | Low                  | Moderate       | Yes                                    |
| <sup>77.</sup> Chin et al (2016)          | Moderate       | Moderate     | Moderate    | High     | Moderate               | Low                      | Moderate         | Low                  | Moderate       | Yes                                    |
| <sup>78.</sup> Agrawal et al (2016)       | Low            | Moderate     | Moderate    | High     | Moderate               | High                     | Moderate         | Unclear              | Moderate       | Yes                                    |
| <sup>79.</sup> Gu et al (2018)            | Moderate       | Moderate     | Moderate    | High     | Moderate               | High                     | Moderate         | Low                  | Moderate       | Yes                                    |
| <sup>80.</sup> Gunn et al (2012)          | Low            | Moderate     | Moderate    | High     | Moderate               | High                     | Moderate         | Low                  | Moderate       | Yes                                    |
| <sup>81.</sup> Han et al (2013)           | High           | High         | Moderate    | High     | Moderate               | High                     | Moderate         | Unclear              | High           | No                                     |
| <sup>82.</sup> Hanlon et al (2018)        | Low            | Moderate     | Moderate    | High     | Low                    | Low                      | Moderate         | Low                  | Low            | Yes                                    |
| <sup>83.</sup> Jantsch et al (2018)       | Moderate       | Moderate     | Moderate    | High     | Moderate               | High                     | Moderate         | Low                  | Moderate       | Yes                                    |

| Author                                        | Selection bias | Study design | Confounders | Blinding | Data collection method | Withdrawals and dropouts | Publication bias | Conflict of interest | Overall rating | Reporting of MM measure and definition |
|-----------------------------------------------|----------------|--------------|-------------|----------|------------------------|--------------------------|------------------|----------------------|----------------|----------------------------------------|
| <sup>84</sup> . John et al (2003)             | Moderate       | High         | Moderate    | High     | Low                    | High                     | Moderate         | Low                  | High           | No                                     |
| <sup>85</sup> . Johnson-Lawrence et al (2017) | Low            | Moderate     | Moderate    | High     | Moderate               | High                     | Moderate         | Low                  | Moderate       | Yes                                    |
| <sup>86</sup> . Johnston et al (2019)         | Moderate       | Moderate     | Moderate    | High     | Moderate               | High                     | Moderate         | Low                  | Moderate       | No                                     |
| <sup>87</sup> . Jones et al (2016)            | Low            | Moderate     | Moderate    | High     | Low                    | Low                      | Moderate         | Unclear              | Moderate       | Yes                                    |
| <sup>88</sup> . Jovic et al (2016)            | Moderate       | Moderate     | Moderate    | High     | Moderate               | High                     | Moderate         | Low                  | Moderate       | Yes                                    |
| <sup>89</sup> . Juul-Larsen et al (2020)      | High           | Moderate     | Moderate    | High     | Moderate               | High                     | Moderate         | Low                  | Moderate       | Yes                                    |
| <sup>90</sup> . Hudon et al (2008)            | Low            | Moderate     | Moderate    | High     | Low                    | Low                      | Moderate         | Low                  | Low            | Yes                                    |
| <sup>91</sup> . Hussain et al (2015)          | Moderate       | Moderate     | High        | High     | Moderate               | Low                      | Moderate         | Low                  | Moderate       | Yes                                    |
| <sup>92</sup> . Ie et al (2017)               | High           | High         | Moderate    | High     | Moderate               | Low                      | Moderate         | Low                  | High           | Yes                                    |
| <sup>93</sup> . Ishizaki et al (2019)         | Moderate       | Moderate     | Low         | High     | Moderate               | High                     | Moderate         | Unclear              | Moderate       | Yes                                    |
| <sup>94</sup> . Danon-Hersch et al (2012)     | Moderate       | High         | Moderate    | High     | Moderate               | High                     | Moderate         | Low                  | Moderate       | Yes                                    |
| <sup>95</sup> . de Heer et al (2013)          | Moderate       | Moderate     | Moderate    | High     | Moderate               | High                     | Moderate         | Unclear              | Moderate       | Yes                                    |
| <sup>96</sup> . Demirchyan et al (2013)       | High           | Moderate     | Low         | High     | Moderate               | High                     | Moderate         | Low                  | High           | No                                     |
| <sup>97</sup> . Fabbri et al (2015)           | Moderate       | Moderate     | High        | High     | Moderate               | High                     | Moderate         | Unclear              | Moderate       | Yes                                    |
| <sup>98</sup> . Fillenbaum et al (2000)       | Low            | Moderate     | Moderate    | High     | Moderate               | High                     | Moderate         | Unclear              | Moderate       | Yes                                    |

| Author                                  | Selection bias | Study design | Confounders | Blinding | Data collection method | Withdrawals and dropouts | Publication bias | Conflict of interest | Overall rating | Reporting of MM measure and definition |
|-----------------------------------------|----------------|--------------|-------------|----------|------------------------|--------------------------|------------------|----------------------|----------------|----------------------------------------|
| <sup>99.</sup> Kaneko et al (2019)      | Moderate       | Moderate     | High        | High     | Moderate               | Low                      | Moderate         | Low                  | Moderate       | No                                     |
| <sup>100.</sup> Kang et al (2017)       | High           | Moderate     | Moderate    | High     | Moderate               | High                     | Moderate         | Low                  | Moderate       | Yes                                    |
| <sup>101.</sup> Gandhi et al (2020)     | Moderate       | Moderate     | Moderate    | High     | High                   | High                     | Moderate         | Low                  | Moderate       | Yes                                    |
| <sup>102.</sup> Costa et al (2018)      | High           | Moderate     | Moderate    | High     | Moderate               | High                     | Moderate         | Unclear              | Moderate       | Yes                                    |
| <sup>103.</sup> Rizzuto et al (2017)    | High           | Moderate     | High        | High     | Moderate               | Moderate                 | Moderate         | Low                  | Moderate       | Yes                                    |
| <sup>104.</sup> Dhalwani et al (2017)   | Moderate       | Moderate     | Low         | High     | Moderate               | High                     | Moderate         | Low                  | Moderate       | Yes                                    |
| <sup>105.</sup> Elixhauser et al (1998) | Low            | Moderate     | High        | High     | Low                    | Low                      | Moderate         | Unclear              | Low            | Yes                                    |
| <sup>106.</sup> Fabbri et al (2015)     | High           | Moderate     | Moderate    | High     | Moderate               | High                     | Moderate         | Low                  | Moderate       | Yes                                    |
| <sup>107.</sup> Fortin et al (2014)     | Low            | Moderate     | Low         | High     | Moderate               | Moderate                 | Moderate         | Low                  | Moderate       | Yes                                    |
| <sup>108.</sup> Fuchs et al (1998)      | Moderate       | Moderate     | Moderate    | High     | Moderate               | Low                      | Moderate         | Unclear              | Moderate       | No                                     |
| <sup>109.</sup> Galenkamp et al (2011)  | Low            | Moderate     | High        | High     | Moderate               | High                     | Moderate         | Unclear              | High           | No                                     |
| <sup>110.</sup> Galenkamp et al (2016)  | Low            | Moderate     | Moderate    | High     | Moderate               | High                     | Moderate         | Unclear              | Moderate       | Yes                                    |
| <sup>111.</sup> Gamma et al (2001)      | High           | Moderate     | High        | High     | Moderate               | High                     | Moderate         | Unclear              | High           | No                                     |
| <sup>112.</sup> Ge et al (2018)         | Moderate       | Moderate     | High        | High     | Moderate               | High                     | Moderate         | Unclear              | Moderate       | Yes                                    |
| <sup>113.</sup> Ge et al (2019)         | Moderate       | Moderate     | Moderate    | High     | Moderate               | High                     | Moderate         | Unclear              | Moderate       | Yes                                    |

| Author                                  | Selection bias | Study design | Confounders | Blinding | Data collection method | Withdrawals and dropouts | Publication bias | Conflict of interest | Overall rating | Reporting of MM measure and definition |
|-----------------------------------------|----------------|--------------|-------------|----------|------------------------|--------------------------|------------------|----------------------|----------------|----------------------------------------|
| <sup>114.</sup> Gould et al (2016)      | Moderate       | Moderate     | Moderate    | High     | High                   | High                     | Moderate         | Unclear              | Moderate       | Yes                                    |
| <sup>115.</sup> Habib et al (2014)      | Moderate       | Moderate     | Moderate    | High     | Moderate               | High                     | Moderate         | Unclear              | Moderate       | No                                     |
| <sup>116.</sup> Harrison et al (2017)   | Low            | Moderate     | High        | High     | Moderate               | Low                      | Moderate         | Unclear              | Moderate       | No                                     |
| <sup>117.</sup> Hayek et al (2017)      | Low            | Moderate     | Moderate    | High     | Moderate               | High                     | Moderate         | Unclear              | Moderate       | Yes                                    |
| <sup>118.</sup> Henninger et al (2012)  | Moderate       | Moderate     | High        | High     | Moderate               | High                     | Moderate         | Unclear              | Moderate       | No                                     |
| <sup>119.</sup> Hernandez et al (2019)  | Moderate       | Moderate     | Moderate    | High     | High                   | High                     | Moderate         | Unclear              | Moderate       | Yes                                    |
| <sup>120.</sup> Ho et al (2014)         | Moderate       | Moderate     | High        | High     | Low                    | Low                      | Moderate         | Low                  | Moderate       | Yes                                    |
| <sup>121.</sup> Khan et al (2019)       | Low            | Moderate     | Low         | High     | Low                    | High                     | Moderate         | Low                  | Low            | Yes                                    |
| <sup>122.</sup> Kiliari et al (2013)    | High           | Moderate     | High        | High     | Moderate               | Moderate                 | Moderate         | Low                  | Moderate       | No                                     |
| <sup>123.</sup> King et al (2018)       | Moderate       | Moderate     | Moderate    | High     | Moderate               | High                     | Moderate         | Unclear              | Moderate       | Yes                                    |
| <sup>124.</sup> Kingston et al (2018)   | Low            | Moderate     | High        | High     | Moderate               | High                     | Moderate         | Unclear              | High           | Yes                                    |
| <sup>125.</sup> Koyanagi et al (2018)   | Low            | Moderate     | Moderate    | High     | Moderate               | Low                      | High             | Low                  | Moderate       | Yes                                    |
| <sup>126.</sup> Kriegsman et al (2004)  | Moderate       | Moderate     | Moderate    | High     | Moderate               | High                     | Moderate         | Unclear              | Moderate       | Yes                                    |
| <sup>127.</sup> Kristensen et al (2019) | Low            | Moderate     | Moderate    | High     | Moderate               | High                     | Moderate         | Low                  | Moderate       | Yes                                    |
| <sup>128.</sup> Kristensen et al (2019) | Moderate       | Moderate     | Moderate    | High     | Moderate               | High                     | Moderate         | Low                  | Moderate       | Yes                                    |

| Author                                                 | Selection bias | Study design | Confounders | Blinding | Data collection method | Withdrawals and dropouts | Publication bias | Conflict of interest | Overall rating | Reporting of MM measure and definition |
|--------------------------------------------------------|----------------|--------------|-------------|----------|------------------------|--------------------------|------------------|----------------------|----------------|----------------------------------------|
| <sup>129.</sup> Kunna et al (2017)                     | Low            | Moderate     | Low         | High     | Moderate               | Low                      | High             | Low                  | Low            | Yes                                    |
| <sup>130.</sup> Kuwornu et al (2014)                   | Moderate       | Moderate     | High        | High     | Moderate               | Low                      | Moderate         | Low                  | Moderate       | Yes                                    |
| <sup>131.</sup> Lai et al (2019)                       | Low            | Moderate     | High        | High     | Moderate               | Low                      | Moderate         | Low                  | Moderate       | Yes                                    |
| <sup>132.</sup> Lai et al (2018)                       | High           | Moderate     | Moderate    | High     | Moderate               | High                     | Moderate         | Low                  | Moderate       | Yes                                    |
| <sup>133.</sup> Laires et al (2019)                    | Low            | Moderate     | Moderate    | High     | Moderate               | High                     | Moderate         | Unclear              | Moderate       | Yes                                    |
| <sup>134.</sup> Lang et al (2015)                      | Moderate       | Moderate     | Moderate    | High     | Moderate               | Moderate                 | Moderate         | Low                  | Moderate       | Yes                                    |
| <sup>135.</sup> Le Cossec et al (2016)                 | Low            | Moderate     | Moderate    | High     | Moderate               | Moderate                 | Moderate         | Low                  | Moderate       | Yes                                    |
| <sup>136.</sup> Lee et al (2007)                       | Low            | Moderate     | High        | High     | Low                    | Low                      | Moderate         | Low                  | Low            | Yes                                    |
| <sup>137.</sup> Lee et al (2018)                       | Low            | Moderate     | High        | High     | High                   | Low                      | Moderate         | Unclear              | High           | No                                     |
| <sup>138.</sup> Li et al (2016)                        | Low            | Low          | Moderate    | High     | Moderate               | High                     | Moderate         | Low                  | Moderate       | Yes                                    |
| <sup>139.</sup> Li et al (2019)                        | Low            | Moderate     | Low         | High     | Moderate               | Moderate                 | Moderate         | Low                  | Moderate       | No                                     |
| <sup>140.</sup> Lujic et al (2017)                     | Low            | Moderate     | Moderate    | High     | Low                    | High                     | Moderate         | Low                  | Moderate       | Yes                                    |
| <sup>141.</sup> LupianezUnclearVillanueva et al (2018) | Moderate       | Moderate     | Moderate    | High     | Moderate               | High                     | Moderate         | Low                  | Moderate       | Yes                                    |
| <sup>142.</sup> Zhou et al (2018)                      | Moderate       | Moderate     | Moderate    | High     | Moderate               | Low                      | High             | Low                  | Moderate       | Yes                                    |
| <sup>143.</sup> Zhang et al (2019)                     | Low            | Moderate     | Moderate    | High     | Moderate               | High                     | Moderate         | Low                  | Moderate       | Yes                                    |

| Author                                   | Selection bias | Study design | Confounders | Blinding | Data collection method | Withdrawals and dropouts | Publication bias | Conflict of interest | Overall rating | Reporting of MM measure and definition |
|------------------------------------------|----------------|--------------|-------------|----------|------------------------|--------------------------|------------------|----------------------|----------------|----------------------------------------|
| <sup>144.</sup> Wong et al (2010)        | High           | Moderate     | Moderate    | High     | Moderate               | High                     | Moderate         | Unclear              | Moderate       | Yes                                    |
| <sup>145.</sup> Weimann et al (2016)     | Low            | Moderate     | Low         | High     | Moderate               | High                     | Moderate         | Low                  | Moderate       | Yes                                    |
| <sup>146.</sup> Wang et al (2017)        | Low            | Moderate     | Low         | High     | Moderate               | High                     | Moderate         | Low                  | Moderate       | Yes                                    |
| <sup>147.</sup> Wang et al (2019)        | Moderate       | Moderate     | Moderate    | High     | Moderate               | High                     | Moderate         | Low                  | Moderate       | No                                     |
| <sup>148.</sup> Wade et al (2019)        | Moderate       | Moderate     | Moderate    | High     | Moderate               | High                     | Moderate         | Unclear              | Moderate       | Yes                                    |
| <sup>149.</sup> Maciejewski et al (2019) | Low            | Moderate     | Moderate    | High     | Moderate               | High                     | Moderate         | Unclear              | Moderate       | Yes                                    |
| <sup>150.</sup> Marengoni et al (2016)   | Moderate       | Moderate     | High        | High     | Moderate               | High                     | Moderate         | Low                  | Moderate       | Yes                                    |
| <sup>151.</sup> Marengoni et al (2009)   | Moderate       | Moderate     | High        | High     | Moderate               | High                     | Moderate         | Unclear              | Moderate       | Yes                                    |
| <sup>152.</sup> Marques et al (2018)     | Low            | Moderate     | Moderate    | High     | Moderate               | High                     | Moderate         | Low                  | Moderate       | Yes                                    |
| <sup>153.</sup> Mavaddat et al (2014)    | Low            | Moderate     | Moderate    | High     | Moderate               | High                     | Moderate         | Low                  | Moderate       | Yes                                    |
| <sup>154.</sup> McDavid et al (2013)     | Low            | Moderate     | High        | High     | Moderate               | High                     | Moderate         | Low                  | High           | Yes                                    |
| <sup>155.</sup> Melis et al (2014)       | High           | Moderate     | Moderate    | High     | Moderate               | High                     | Moderate         | Unclear              | Moderate       | Yes                                    |
| <sup>156.</sup> Min et al (2007)         | High           | Moderate     | High        | High     | Moderate               | High                     | Moderate         | Unclear              | High           | Yes                                    |
| <sup>157.</sup> Momtaz et al (2010)      | Moderate       | Moderate     | Moderate    | High     | Moderate               | High                     | Moderate         | Unclear              | Moderate       | Yes                                    |
| <sup>158.</sup> Mondor et al (2018)      | Low            | Moderate     | Low         | High     | Moderate               | High                     | Moderate         | Low                  | Moderate       | Yes                                    |

| Author                                  | Selection bias | Study design | Confounders | Blinding | Data collection method | Withdrawals and dropouts | Publication bias | Conflict of interest | Overall rating | Reporting of MM measure and definition |
|-----------------------------------------|----------------|--------------|-------------|----------|------------------------|--------------------------|------------------|----------------------|----------------|----------------------------------------|
| <sup>159.</sup> Muggah et al (2012)     | Low            | Moderate     | High        | High     | Moderate               | Low                      | Moderate         | Low                  | Moderate       | No                                     |
| <sup>160.</sup> Nagel et al (2008)      | Low            | Moderate     | Low         | High     | Moderate               | High                     | Moderate         | Low                  | Moderate       | Yes                                    |
| <sup>161.</sup> Niedzwiedz et al (2019) | Moderate       | Moderate     | High        | High     | Moderate               | Low                      | Moderate         | Unclear              | Moderate       | Yes                                    |
| <sup>162.</sup> Nunes et al (2016)      | Moderate       | Moderate     | Moderate    | High     | Moderate               | High                     | Moderate         | Low                  | Moderate       | Yes                                    |
| <sup>163.</sup> Nunes et al (2017)      | Low            | Moderate     | Moderate    | High     | Low                    | High                     | Moderate         | Low                  | Moderate       | Yes                                    |
| <sup>164.</sup> Nunes et al (2015)      | Moderate       | Moderate     | Moderate    | High     | Moderate               | High                     | Moderate         | Low                  | Moderate       | Yes                                    |
| <sup>165.</sup> Olaya et al (2017)      | Low            | Moderate     | Moderate    | High     | Moderate               | High                     | Moderate         | Low                  | Moderate       | Yes                                    |
| <sup>166.</sup> Olivares et al (2017)   | High           | Moderate     | Moderate    | High     | Moderate               | High                     | Moderate         | Low                  | Moderate       | No                                     |
| <sup>167.</sup> Park et al (2018)       | Moderate       | Moderate     | Moderate    | High     | Moderate               | High                     | Moderate         | Low                  | Moderate       | No                                     |
| <sup>168.</sup> Patel et al (2006)      | Moderate       | Moderate     | High        | High     | Moderate               | High                     | Moderate         | Unclear              | Moderate       | No                                     |
| <sup>169.</sup> Pati et al (2016)       | High           | Moderate     | Moderate    | High     | Moderate               | High                     | Moderate         | Low                  | Moderate       | Yes                                    |
| <sup>170.</sup> Pati et al (2019)       | Moderate       | Moderate     | Moderate    | High     | Moderate               | Moderate                 | Moderate         | Low                  | Moderate       | Yes                                    |
| <sup>171.</sup> Payne et al (2013)      | Low            | Moderate     | Moderate    | High     | Moderate               | Low                      | Moderate         | Unclear              | Moderate       | Yes                                    |
| <sup>172.</sup> Perez et al (2020)      | Moderate       | Moderate     | Moderate    | High     | Moderate               | Moderate                 | Moderate         | Low                  | Moderate       | Yes                                    |
| <sup>173.</sup> Petersen et al (2019)   | Moderate       | Moderate     | Moderate    | High     | Moderate               | High                     | Moderate         | Low                  | Moderate       | No                                     |

| Author                                    | Selection bias | Study design | Confounders | Blinding | Data collection method | Withdrawals and dropouts | Publication bias | Conflict of interest | Overall rating | Reporting of MM measure and definition |
|-------------------------------------------|----------------|--------------|-------------|----------|------------------------|--------------------------|------------------|----------------------|----------------|----------------------------------------|
| <sup>174.</sup> Pfortmueller et al (2013) | Moderate       | Moderate     | High        | High     | High                   | High                     | Moderate         | Unclear              | High           | No                                     |
| <sup>175.</sup> Pressley et al (1999)     | Low            | Moderate     | High        | High     | Moderate               | Low                      | Moderate         | Unclear              | Moderate       | No                                     |
| <sup>176.</sup> Prior et al (2016)        | Low            | Moderate     | Moderate    | High     | Moderate               | Low                      | Moderate         | Unclear              | Moderate       | Yes                                    |
| <sup>177.</sup> Ribeiro et al (2018)      | High           | Moderate     | Moderate    | High     | Moderate               | High                     | Moderate         | Unclear              | Moderate       | Yes                                    |
| <sup>178.</sup> Ruel et al (2014)         | Moderate       | Moderate     | Moderate    | High     | Moderate               | High                     | Moderate         | Unclear              | Moderate       | Yes                                    |
| <sup>179.</sup> Ruel et al (2014)         | Moderate       | Moderate     | Moderate    | High     | Low                    | High                     | Moderate         | Low                  | Moderate       | Yes                                    |
| <sup>180.</sup> Ryan et al (2018)         | Moderate       | Moderate     | Moderate    | High     | Moderate               | High                     | Moderate         | Low                  | Moderate       | Yes                                    |
| <sup>181.</sup> Schmidt et al (2016)      | Low            | Moderate     | Moderate    | High     | Moderate               | High                     | Moderate         | Unclear              | Moderate       | Yes                                    |
| <sup>182.</sup> Schottker et al (2016)    | Moderate       | Moderate     | Moderate    | High     | Moderate               | Moderate                 | Moderate         | Low                  | Moderate       | Yes                                    |
| <sup>183.</sup> Seo et al (2017)          | Low            | Moderate     | Moderate    | High     | Low                    | High                     | Moderate         | Low                  | Moderate       | No                                     |
| <sup>184.</sup> She et al (2019)          | Moderate       | Moderate     | Moderate    | High     | Moderate               | High                     | Moderate         | Low                  | Moderate       | Yes                                    |
| <sup>185.</sup> Singh et al (2019)        | Low            | Moderate     | Moderate    | High     | Low                    | Low                      | Moderate         | Unclear              | Moderate       | Yes                                    |
| <sup>186.</sup> Stepanova et al (2015)    | Low            | High         | High        | High     | High                   | High                     | High             | Unclear              | High           | Yes                                    |
| <sup>187.</sup> Stickley et al (2020)     | Low            | Moderate     | High        | High     | Moderate               | High                     | Moderate         | Low                  | High           | Yes                                    |
| <sup>188.</sup> Streit et al (2014)       | Moderate       | Moderate     | Moderate    | High     | High                   | High                     | Moderate         | Unclear              | Moderate       | Yes                                    |

| Author                                   | Selection bias | Study design | Confounders | Blinding | Data collection method | Withdrawals and dropouts | Publication bias | Conflict of interest | Overall rating | Reporting of MM measure and definition |
|------------------------------------------|----------------|--------------|-------------|----------|------------------------|--------------------------|------------------|----------------------|----------------|----------------------------------------|
| <sup>189.</sup> Stubbs et al (2018)      | Low            | Moderate     | High        | High     | Moderate               | Low                      | Moderate         | Low                  | Moderate       | Yes                                    |
| <sup>190.</sup> Su et al (2016)          | Moderate       | Moderate     | Moderate    | High     | Moderate               | High                     | Moderate         | Low                  | Moderate       | Yes                                    |
| <sup>191.</sup> Sundstrup et al (2017)   | Low            | Moderate     | High        | High     | Moderate               | High                     | Moderate         | Unclear              | High           | Yes                                    |
| <sup>192.</sup> Takahashi et al (2016)   | Moderate       | Moderate     | High        | High     | High                   | Low                      | Moderate         | Low                  | High           | No                                     |
| <sup>193.</sup> Tinetti et al (2011)     | Low            | Moderate     | High        | High     | High                   | High                     | Moderate         | Unclear              | High           | No                                     |
| <sup>194.</sup> Troelstra et al (2020)   | High           | Moderate     | High        | High     | Moderate               | Low                      | Moderate         | Unclear              | High           | Yes                                    |
| <sup>195.</sup> van Zon et al (2020)     | Moderate       | Moderate     | Moderate    | High     | Moderate               | High                     | Moderate         | Unclear              | Moderate       | Yes                                    |
| <sup>196.</sup> Vancampfort et al (2017) | Low            | Moderate     | Moderate    | High     | Moderate               | Low                      | Moderate         | Low                  | Moderate       | Yes                                    |
| <sup>197.</sup> Vassilaki et al (2015)   | Low            | Moderate     | Moderate    | High     | Moderate               | Low                      | Moderate         | Unclear              | Moderate       | Yes                                    |
| <sup>198.</sup> Vassilaki et al (2016)   | Low            | Moderate     | Moderate    | High     | Moderate               | Low                      | Moderate         | Unclear              | Moderate       | Yes                                    |
| <sup>199.</sup> Villarreal et al (2015)  | High           | Moderate     | Moderate    | High     | Moderate               | High                     | Moderate         | Low                  | Moderate       | No                                     |
| <sup>200.</sup> Violan et al (2019)      | Low            | Moderate     | Moderate    | High     | High                   | Low                      | Moderate         | Low                  | Moderate       | Yes                                    |
| <sup>201.</sup> von Strauss et al (2000) | Moderate       | Moderate     | Moderate    | High     | Moderate               | Low                      | Moderate         | Low                  | Moderate       | No                                     |
| <sup>202.</sup> Vos et al (2013)         | Moderate       | Moderate     | High        | High     | Moderate               | High                     | Moderate         | Low                  | Moderate       | No                                     |
| <sup>203.</sup> Vu et al (2019)          | High           | Moderate     | High        | High     | Moderate               | High                     | Moderate         | Low                  | High           | No                                     |

| Author                                    | Selection bias | Study design | Confounders | Blinding | Data collection method | Withdrawals and dropouts | Publication bias | Conflict of interest | Overall rating | Reporting of MM measure and definition |
|-------------------------------------------|----------------|--------------|-------------|----------|------------------------|--------------------------|------------------|----------------------|----------------|----------------------------------------|
| <sup>204.</sup> Wang et al (2018)         | Moderate       | Moderate     | Low         | High     | Moderate               | Low                      | Moderate         | Unclear              | Moderate       | Yes                                    |
| <sup>205.</sup> Wang et al (2017)         | Moderate       | Moderate     | Moderate    | High     | Moderate               | High                     | Moderate         | Low                  | Moderate       | Yes                                    |
| <sup>206.</sup> Wijers et al (2019)       | Low            | Moderate     | Moderate    | High     | Moderate               | High                     | Moderate         | Low                  | Moderate       | No                                     |
| <sup>207.</sup> Williams et al (2016)     | Moderate       | Moderate     | Moderate    | High     | Moderate               | High                     | Moderate         | Unclear              | Moderate       | No                                     |
| <sup>208.</sup> Woldeamayrat et al (2018) | High           | Moderate     | Moderate    | High     | Moderate               | High                     | Moderate         | Low                  | Moderate       | Yes                                    |
| <sup>209.</sup> Yao et al (2020)          | Moderate       | Moderate     | Low         | High     | Moderate               | High                     | Moderate         | Low                  | Moderate       | Yes                                    |
| <sup>210.</sup> Yorke et al (2017)        | Moderate       | Moderate     | Moderate    | High     | Moderate               | High                     | Moderate         | Unclear              | Moderate       | Yes                                    |
| <sup>211.</sup> You et al (2019)          | Moderate       | Moderate     | Moderate    | High     | Moderate               | High                     | Moderate         | Low                  | Moderate       | Yes                                    |
| <sup>212.</sup> Zhang et al (2020)        | Moderate       | Moderate     | Low         | High     | Moderate               | Low                      | Moderate         | Low                  | Moderate       | Yes                                    |
| <sup>213.</sup> Khanam et al (2011)       | Moderate       | Moderate     | Moderate    | High     | Moderate               | Low                      | Moderate         | Unclear              | Moderate       | Yes                                    |
| <sup>214.</sup> Cornell et al (2009)      | Low            | Moderate     | High        | High     | Moderate               | Low                      | Moderate         | Unclear              | Moderate       | Yes                                    |
| <sup>215.</sup> Cassell et al (2018)      | Low            | Moderate     | High        | High     | Moderate               | Moderate                 | Moderate         | Low                  | Moderate       | No                                     |
| <sup>216.</sup> Wong et al (2019)         | High           | Moderate     | Moderate    | High     | Moderate               | High                     | Moderate         | Unclear              | Moderate       | Yes                                    |
| <sup>217.</sup> Puth et al (2017)         | Moderate       | Moderate     | Moderate    | High     | Moderate               | Moderate                 | Moderate         | Low                  | Moderate       | Yes                                    |

Table S7: Output of adjusted meta-analytic model based on 217 studies

|                          | Pooled prevalence of multimorbidity of each subgroup (%; 95% CI) | Meta-regression Unadjusted Odds Ratio (95% CI) | Meta-regression Adjusted Odds Ratio (95% CI) R <sup>2</sup> 42.4% | FMI  |
|--------------------------|------------------------------------------------------------------|------------------------------------------------|-------------------------------------------------------------------|------|
| <b>Group of mean age</b> |                                                                  | R <sup>2</sup> 27.0%                           |                                                                   |      |
| <59                      | 30.4 (27.0-33.9)                                                 | Ref                                            | Ref                                                               | Ref  |
| 59-73                    | 43.5 (38.0-49.1)                                                 | 1.8 (1.3-2.3)***                               | 2.0 (1.6-2.6)***                                                  | 0.3  |
| ≥74                      | 67.8 (61.3-73.7)                                                 | 6.4 (4.6-8.9)***                               | 4.7 (3.4-6.5)***                                                  | 0.2  |
| <b>No of conditions</b>  |                                                                  | R <sup>2</sup> 6.9%                            |                                                                   |      |
| <9                       | 29.9 (24.9-35.4)                                                 | Ref                                            | Ref                                                               | Ref  |
| 9-19                     | 43.5 (39.1-47.9)                                                 | 1.8 (1.3-2.5)***                               | 1.7 (1.3-2.2)***                                                  | 0.1  |
| 20-43                    | 46.7 (38.4-55.2)                                                 | 2.1 (1.4-3.1)***                               | 2.2 (1.5-3.3)***                                                  | 0.2  |
| ≥44                      | 54.5 (32.6-74.8)                                                 | 2.8 (1.5-5.4)**                                | 2.8 (1.6-4.8)***                                                  | 0.1  |
| <b>Setting</b>           |                                                                  | R <sup>2</sup> 3.7%                            |                                                                   |      |
| Community                | 37.8 (34.4-41.4)                                                 | Ref                                            | Ref                                                               | Ref  |
| Primary care             | 51.2 (41.6-60.7)                                                 | 1.7 (1.2-2.5)**                                | 1.8 (1.2-2.6)**                                                   | 0.1  |
| Hospital                 | 47.1 (31.9-63.0)                                                 | 1.5 (0.9-2.4)                                  | 0.8 (0.5-1.3)                                                     | 0.1  |
| Care home                | 73.9 (72.8-74.9)                                                 | 4.6 (0.6-36.6)                                 | 1.5 (0.3-8.4)                                                     | 0.04 |
| <b>Source</b>            |                                                                  | R <sup>2</sup> 2.8%                            |                                                                   |      |
| Self-report              | 38.3 (34.4-42.2)                                                 | Ref                                            | Ref                                                               | Ref  |
| Database                 | 48.9 (42.2-55.6)                                                 | 1.5 (1.1-2.1)**                                | 0.8 (0.6-1.1)                                                     | 0.1  |
| <b>Continent</b>         |                                                                  | R <sup>2</sup> 7.4%                            |                                                                   |      |
| North America            | 48.9 (42.1-55.7)                                                 | Ref                                            | Ref                                                               | Ref  |
| Europe                   | 44.0 (37.7-50.4)                                                 | 0.8 (0.6-1.2)                                  | 0.5 (0.4-0.7)***                                                  | 0.1  |
| Australasia              | 28.2 (20.3-37.6)                                                 | 0.4 (0.2-0.8)**                                | 0.4 (0.2-0.6)***                                                  | 0.08 |
| Asia                     | 34.3 (28.6-40.5)                                                 | 0.5 (0.4-0.8)**                                | 0.5 (0.3-0.7)***                                                  | 0.1  |
| South America            | 47.5 (31.2-64.4)                                                 | 0.9 (0.5-1.8)                                  | 0.8 (0.5-1.3)                                                     | 0.1  |
| Africa                   | 13.8 (4.5-35.2)                                                  | 0.2 (0.06-0.5)***                              | 0.2 (0.1-0.5)***                                                  | 0.1  |
| Multiple continents      | 41.4 (31.0-52.6)                                                 | 0.7 (0.4-1.4)                                  | 0.7 (0.4-1.2)                                                     | 0.1  |

\*&lt;0.05 \*\*&lt;0.01 \*\*\*&lt;0.001

Ref: Reference category. FMI: Fraction of missing information.

**Table S8: Definition of variables**

| Variable name                                | Definition                                                                                                                                                                                                            |
|----------------------------------------------|-----------------------------------------------------------------------------------------------------------------------------------------------------------------------------------------------------------------------|
| <b>Study setting</b>                         |                                                                                                                                                                                                                       |
| Community                                    | Studies that used population surveys, insurance claims databases, or research databases                                                                                                                               |
| Primary care                                 | Studies that were carried out in primary care settings                                                                                                                                                                |
| Hospital                                     | Studies that were carried out in hospital settings                                                                                                                                                                    |
| <b>Data source</b>                           |                                                                                                                                                                                                                       |
| Self-report                                  | Studies that collected data using self-report or interviews                                                                                                                                                           |
| Medical records and administrative databases | Studies that collected data using electronic medical records, medical chart reviews, insurance claims databases, pharmacy databases, or research databases                                                            |
| <b>Study population</b>                      |                                                                                                                                                                                                                       |
| All adults                                   | Studies with a sample of population aged 18 and older (n=45), aged 20 and older (n=8), aged 21 and older (n=3), aged 25 and older (n=2), or others (n=27) (e.g. aged 16 and older, or aged 17 and older)              |
| Middle-aged and older                        | Studies with a sample of population aged 50 and older (n=25), aged 40 and older (n=5), aged 40 and older (n=10), or others (n=6) (e.g. aged 57 and older, or aged 45 and older)                                       |
| Only older people                            | Studies with a sample of population aged 65 and older (n=22), aged 60 and older (n=25), aged 70 and older (n=5) or others (n=11) (e.g. aged 68 and older, aged 77 and older, aged 78 and older, or aged 80 and older) |

Figure S1: Graphical display of study effect sizes and heterogeneity

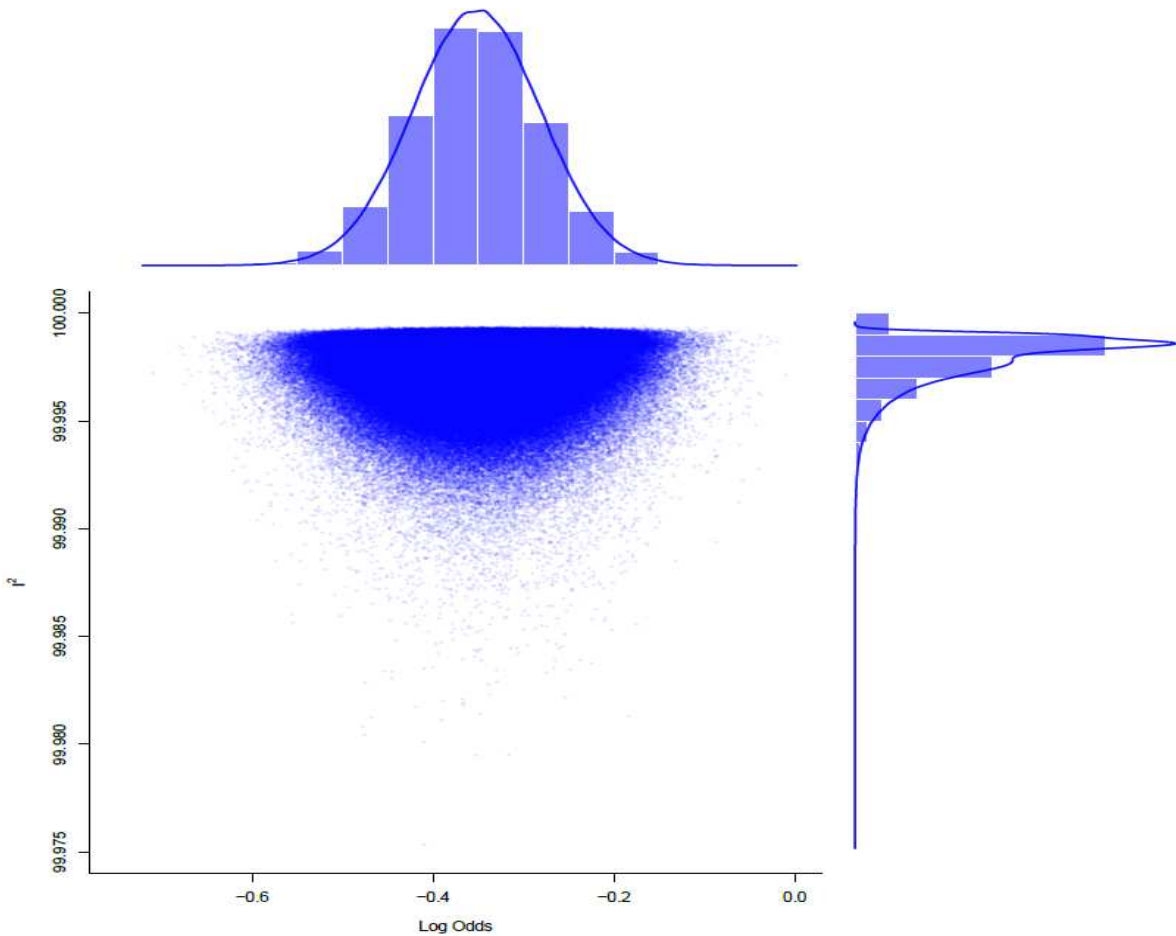

No obvious subgroup effects were identified

Figure S2: Process of examining and identifying outlying studies in meta-analysis

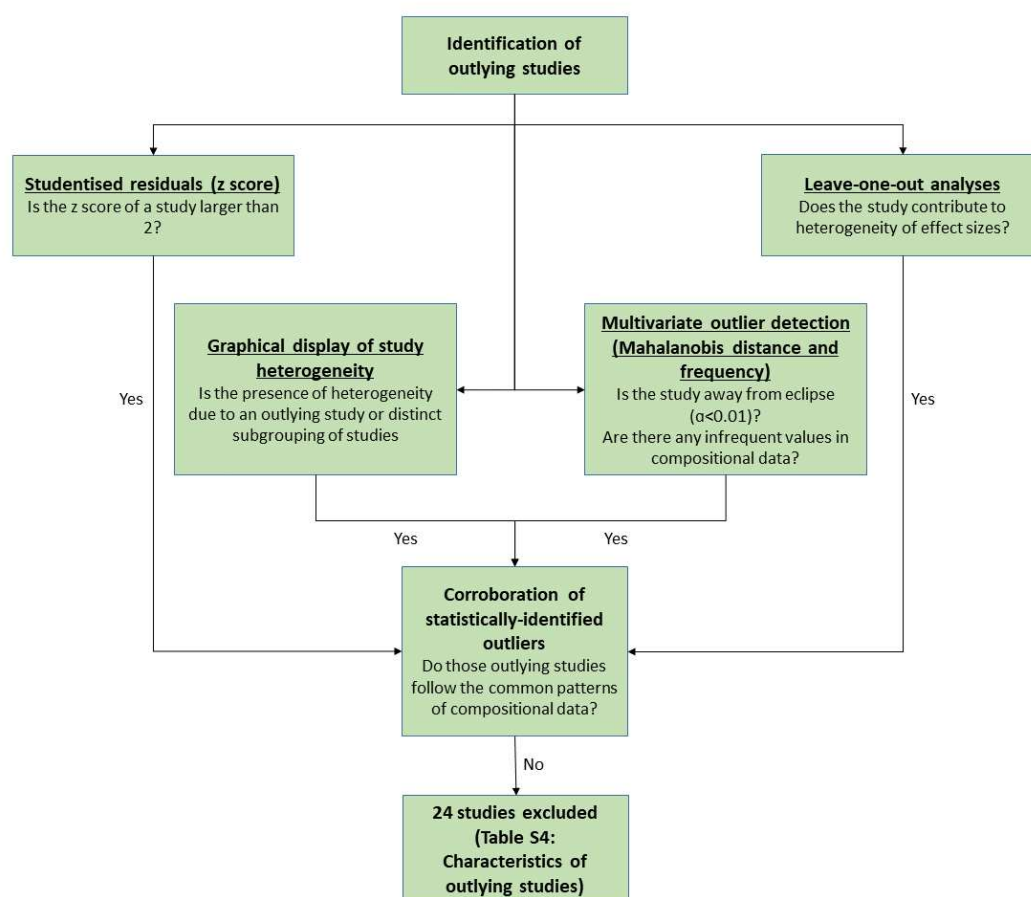

Figure S3: Summary of risk of bias assessment

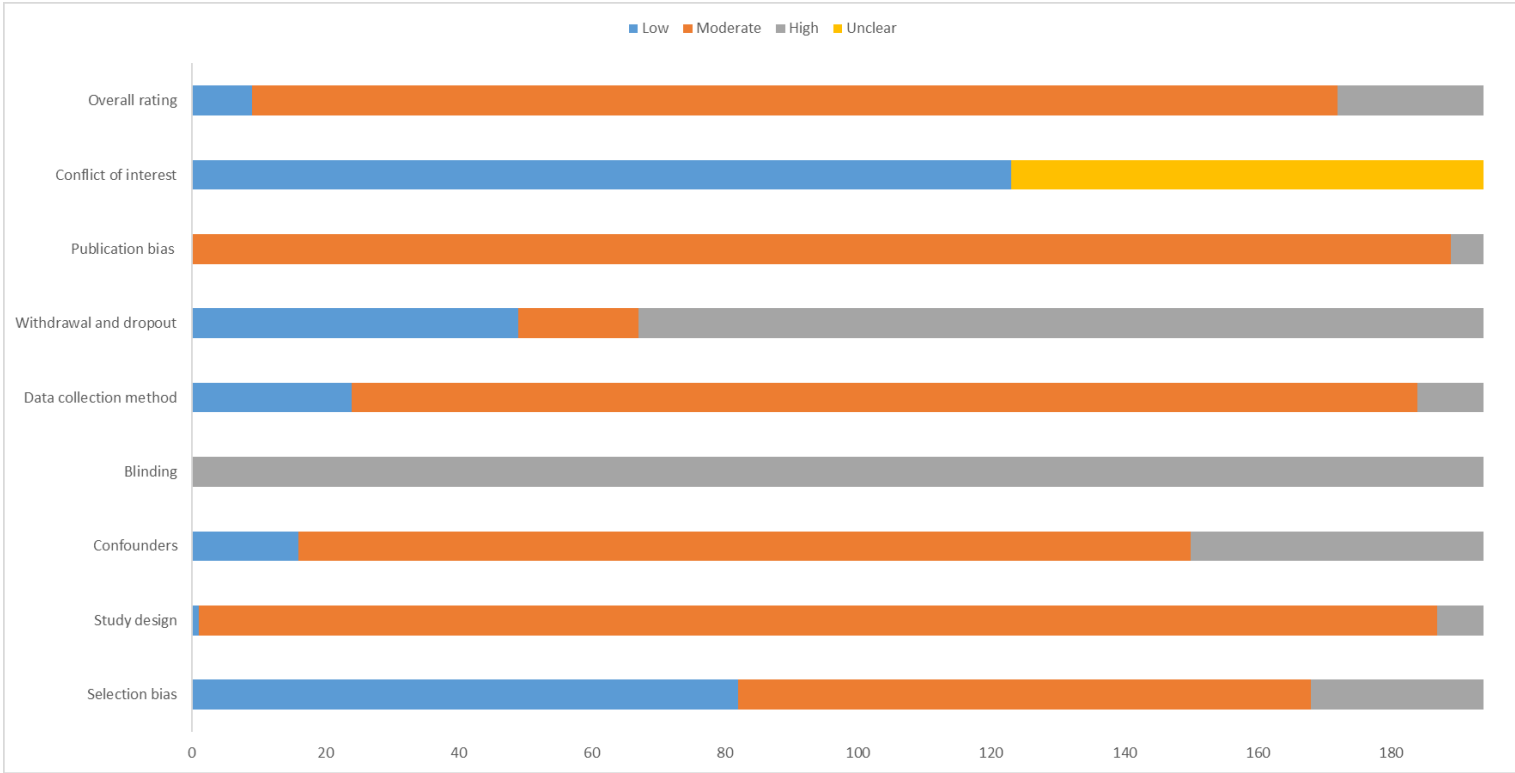

**Figure S4: Meta-regression trees for predicting the pooled estimated prevalence of multimorbidity (based on ‘mean age’ and ‘number of conditions’ predictors. unit: log(odds))**

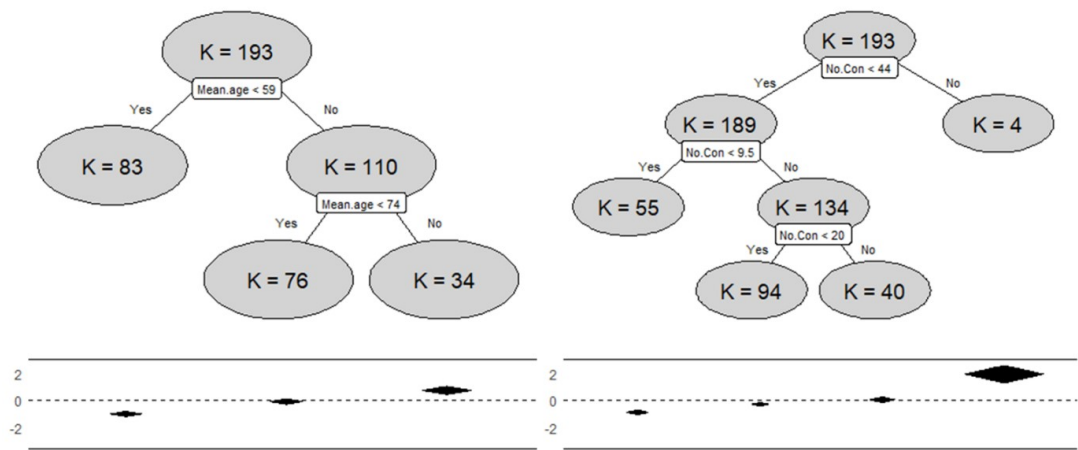

## References

- 1 Stanley J, Semper K, Millar E, Sarfati D. Epidemiology of multimorbidity in New Zealand: A cross-sectional study using national-level hospital and pharmaceutical data. *BMJ Open* 2018; **8**:1-12.
- 2 Lenzi J, Avaldi VM, Rucci P, Pieri G, Fantini MP. Burden of multimorbidity in relation to age, gender and immigrant status: A cross-sectional study based on administrative data. *BMJ Open* 2016; **6**:1-12.
- 3 Hu RH, Hsiao FY, Chen LJ, Huang PT, Hsu WW. Increasing age- and gender-specific burden and complexity of multimorbidity in taiwan, 2003-2013: A cross-sectional study based on nationwide claims data. *BMJ Open* 2019; **9**:1-10.
- 4 Gawron LM, Sanders JN, Sward K, Poursaid AE, Simmons R, Turok DK. Multimorbidity and highly effective contraception in reproductive-age women in the us intermountain west: A retrospective cohort study. *J Gen Intern Med* 2020; **35**:637-42.
- 5 Low LL, Kwan YH, Ko MSM, et al. Epidemiologic characteristics of multimorbidity and sociodemographic factors associated with multimorbidity in a rapidly aging asian country. *JAMA Network Open* 2019; **2**:1-14.
- 6 Wang HHX, Wang JJ, Wong SYS, et al. Epidemiology of multimorbidity in china and implications for the healthcare system: Cross-sectional survey among 162,464 community household residents in southern china. *BMC Medicine* 2014; **12**:1-12.
- 7 Gaulin M, Simard M, Candas B, Lesage A, Sirois C. Combined impacts of multimorbidity and mental disorders on frequent emergency department visits: A retrospective cohort study in quebec, canada. *Canadian Medical Association Journal* 2019; **191**:E724-E32.
- 8 Violan C, Foguet-Boreu Q, Flores-Mateo G, et al. Prevalence, determinants and patterns of multimorbidity in primary care: A systematic review of observational studies. *PLOS One* 2014; **9**:1-9.
- 9 Nicholson K, Terry AL, Fortin M, Williamson T, Bauer M, Thind A. Prevalence, characteristics, and patterns of patients with multimorbidity in primary care: A retrospective cohort analysis in canada. *British Journal of General Practice* 2019; **69**:1-10.
- 10 Bao X-Y, Xie Y-X, Zhang X-X, et al. The association between multimorbidity and health-related quality of life: A cross-sectional survey among community middle-aged and elderly residents in southern china. *Health and quality of life outcomes* 2019; **17**:107-09.
- 11 Fortin M, Bravo G, Hudon C, Vanasse A, Lapointe L. Prevalence of multimorbidity among adults seen in family practice. *Ann Fam Med* 2005; **3**:223-8.
- 12 Prazeres F, Santiago L. Prevalence of multimorbidity in the adult population attending primary care in portugal: A cross-sectional study. *BMJ Open* 2015; **5**:1-10.
- 13 Lawson KD, Mercer SW, Wyke S, et al. Double trouble: The impact of multimorbidity and deprivation on preference-weighted health related quality of life a cross sectional analysis of the scottish health survey. *Int J Equity Health* 2013; **12**:1-9.
- 14 Sullivan PW, Ghushchyan VH, Bayliss EA. The impact of co-morbidity burden on preference-based health-related quality of life in the United States. *Pharmacoeconomics* 2012; **30**:431-42.
- 15 Peng X, Bao X, Xie Y, et al. The mediating effect of pain on the association between multimorbidity and disability and impaired physical performance among community-dwelling older adults in southern china. *Aging Clin Exp Res* 2020; **32**:1327-34.

- 16 Excoffier S, Herzig L, N'Goran AA, Déruaz-Luyet A, Haller DM. Prevalence of multimorbidity in general practice: A cross-sectional study within the Swiss sentinel surveillance system (sentinella). *BMJ Open* 2018; **8**:1-7.
- 17 Chung RY, Mercer S, Lai FTT, Yip BHK, Wong MCS, Wong SYS. Socioeconomic determinants of multimorbidity: A population-based household survey of Hong Kong Chinese. *PLOS ONE* 2015; **10**:1-15.
- 18 Ki M, Lee YH, Kim Y-S, Shin J-Y, Lim J, Nazroo J. Socioeconomic inequalities in health in the context of multimorbidity: A Korean panel study. *PLOS ONE* 2017; **12**:1-14.
- 19 Bobo WV, Yawn BP, St Sauver JL, Grossardt BR, Boyd CM, Rocca WA. Prevalence of combined somatic and mental health multimorbidity: Patterns by age, sex, and race/ethnicity. *J Gerontol - A Biol Sci Med Sci* 2016; **71**:1483-91.
- 20 Randall DA, Lujic S, Havard A, Eades SJ, Jorm L. Multimorbidity among aboriginal people in New South Wales contributes significantly to their higher mortality. *Med J Aust* 2018; **209**:19-23.
- 21 Russell J, Grant CC, Morton SMB. Multimorbidity in early childhood and socioeconomic disadvantage: Findings from a large New Zealand child cohort. *Acad Pediatr* 2020; **20**:619-27.
- 22 Barnett K, Mercer SW, Norbury M, Watt G, Wyke S, Guthrie B. Epidemiology of multimorbidity and implications for health care, research, and medical education: A cross-sectional study. *The Lancet* 2012; **380**:37-43.
- 23 St Sauver JL, Boyd CM, Grossardt BR, et al. Risk of developing multimorbidity across all ages in an historical cohort study: Differences by sex and ethnicity. *BMJ Open* 2015; **5**:1-13.
- 24 Vetrano DL, Foebel AD, Marengoni A, et al. Chronic diseases and geriatric syndromes: The different weight of comorbidity. *Eur J Intern Med* 2016; **27**:62-7.
- 25 Aarts S, den Akker Mv, Bosma H, et al. The effect of multimorbidity on health related functioning: Temporary or persistent? Results from a longitudinal cohort study. *J Psychosom Res* 2012; **73**:211-17.
- 26 Aarts S, van den Akker M, Hajema KJ, et al. Multimorbidity and its relation to subjective memory complaints in a large general population of older adults. *Int Psychogeriatr* 2011; **23**:616-24.
- 27 Aarts S, van den Akker M, Tan FES, Verhey FRJ, Metsemakers JFM, van Boxtel MPJ. Influence of multimorbidity on cognition in a normal aging population: A 12-year follow-up in the maastricht aging study. *Int J Geriatr Psychiatry* 2011; **26**:1046-53.
- 28 Abizanda P, Romero L, Sanchez-Jurado PM, Martinez-Reig M, Alfonso-Silguero SA, Rodriguez-Manas L. Age, frailty, disability, institutionalization, multimorbidity or comorbidity. Which are the main targets in older adults? *J Nutr, Health Aging* 2014; **18**:622-27.
- 29 Agborsangaya CB, Lau D, Lahtinen M, Cooke T, Johnson JA. Health-related quality of life and healthcare utilization in multimorbidity: Results of a cross-sectional survey. *Qual Life Res* 2012; **22**:791-99.
- 30 Agborsangaya CB, Ngwakongnwi E, Lahtinen M, Cooke T, Johnson JA. Multimorbidity prevalence in the general population: The role of obesity in chronic disease clustering. *BMC Public Health* 2013; **13**:1161-61.
- 31 Agborsangaya CB, Lahtinen M, Cooke T, Johnson JA. Comparing the eq-5d 3l and 5l: Measurement properties and association with chronic conditions and multimorbidity in the general population. *Health Qual Life Outcomes* 2014; **12**:1-7.

- 32 Ahrenfeldt LJ, Möller S, Thinggaard M, Christensen K, Lindahl-Jacobsen R. Sex differences in comorbidity and frailty in Europe. *Int J Public Health* 2019; **64**:1025-36.
- 33 Alimohammadian M, Majidi A, Yaseri M, et al. Multimorbidity as an important issue among women: Results of a gender difference investigation in a large population-based cross-sectional study in west asia. *BMJ Open* 2017; **7**:1-8.
- 34 Angst J, Sellaro R, Ries Merikangas K. Multimorbidity of psychiatric disorders as an indicator of clinical severity. *Eur Arch Psychiatry Clin Neurosci* 2002; **252**:147-54.
- 35 Appa AA, Creasman J, Brown JS, et al. The impact of multimorbidity on sexual function in middle-aged and older women: Beyond the single disease perspective. *J Sex Med* 2014; **11**:2744-55.
- 36 Adams ML, Grandpre J, Katz DL, Shenson D. Linear association between number of modifiable risk factors and multiple chronic conditions: Results from the behavioral risk factor surveillance system. *Prev Med* 2017; **105**:169-75.
- 37 Ahmadi B, Alimohammadian M, Yaseri M, et al. Multimorbidity: Epidemiology and risk factors in the golesstan cohort study, iran a cross-sectional analysis. *Medicine* 2016; **95**:1-7.
- 38 Amaral TLM, Amaral CdA, de Lima NS, Herculano PV, Do Prado PR, Monteiro GTR. Multimorbidity, depression and quality of life among elderly people assisted in the family health strategy in senador guiomard, acre, Brazil. *Ciencia e Saude Coletiva* 2018; **23**:3077-84.
- 39 An KO Kim J. Association of sarcopenia and obesity with multimorbidity in Korean adults: A nationwide cross-sectional study. *J Am Med Dir Assoc* 2016; **17**:e1-7.
- 40 Araujo MEA, Silva MT, Galvao TF, Nunes BP, Pereira MG. Prevalence and patterns of multimorbidity in amazon region of Brazil and associated determinants: A cross-sectional study. *BMJ Open* 2018; **8**:1-11.
- 41 Arnold-Reed D, Troeung L, Brett T, et al. Increasing multimorbidity in an Australian street health service: A 10-year retrospective cohort study. *Aust J Gen Pract* 2018; **47**:181-89.
- 42 Arokiasamy P, Uttamacharya U, Jain K, et al. The impact of multimorbidity on adult physical and mental health in low- and middle-income countries: What does the study on global ageing and adult health (sage) reveal? *BMC Med* 2015; **13**:1-16.
- 43 Sinnige J, Korevaar JC, Westert GP, Spreeuwenberg P, Schellevis FG, Braspenning JC. Multimorbidity patterns in a primary care population aged 55 years and over. *Fam Pract* 2015; **32**:505-13.
- 44 Zemedikun DT, Gray LJ, Khunti K, Davies MJ, Dhalwani NN. Patterns of multimorbidity in middle-aged and older adults: An analysis of the uk biobank data. *Mayo Clin Proc* 2018; **93**:857-66.
- 45 Wensing M, Vingerhoets E, Grol R. Functional status, health problems, age and comorbidity in primary care patients. *Qual Life Res* 2001; **10**:141-48.
- 46 Mounce LTAP, Campbell JLMD, Henley WEP, Arreal MCTPMPHLCP, Porter IP, Valderas JMBPMPH. Predicting incident multimorbidity. *Ann Fam Med* 2018; **16**:322-29.
- 47 Taylor AW, Price K, Gill TK, et al. Multimorbidity - not just an older person's issue. Results from an Australian biomedical study. *BMC Public Health* 2010; **10**:1-10.
- 48 Vancampfort D, Stubbs B, Firth J, Koyanagi A. Handgrip strength, chronic physical conditions and physical multimorbidity in middle-aged and older adults in six low- and middle income countries. *Eur J Intern Med* 2019; **61**:96-102.

- 49 Vancampfort D, Smith L, Stubbs B, et al. Associations between active travel and physical multi-morbidity in six low- and middle-income countries among community-dwelling older adults: A cross-sectional study. *PloS one* 2018; **13**:1-15.
- 50 Aubert CE, Streit S, Da Costa BR, et al. Polypharmacy and specific comorbidities in university primary care settings. *Eur J Intern Med* 2016; **35**:35-42.
- 51 Autenrieth CS, Kirchberger I, Heier M, et al. Physical activity is inversely associated with multimorbidity in elderly men: Results from the kora-age augsburg study. *Prev Med* 2013; **57**:17-19.
- 52 Bähler C, Huber CA, Brüngger B, Reich O. Multimorbidity, health care utilization and costs in an elderly community-dwelling population: A claims data based observational study. *BMC Health Services Res* 2015; **15**:1-12.
- 53 Vancampfort DK, A.: Ward, P. B.: Veronese, N.: Carvalho, A. F.: Solmi, M.: Mugisha, J.: Rosenbaum, S.: De Hert, M.: Stubbs, B. Perceived stress and its relationship with chronic medical conditions and multimorbidity among 229,293 community-dwelling adults in 44 low- and middle-income countries. *Am J Epidemiol* 2017; **186**:979-89.
- 54 Banjare P Pradhan J. Socio-economic inequalities in the prevalence of multi-morbidity among the rural elderly in Bargarh district of Odisha (India). *PLoS ONE* 2014; **9**:1-10.
- 55 Barra M, Augestad LA, Whitehurst DGT, Rand-Hendriksen K. Examining the relationship between health-related quality of life and increasing numbers of diagnoses. *Qual life Res* 2015; **24**:2823-32.
- 56 Bernard S, Inderjeeth C, Raymond W. Higher charlson comorbidity index scores do not influence functional independence measure score gains in older rehabilitation patients. *Aust J Ageing* 2016; **35**:236-41.
- 57 Biswas T, Townsend N, Islam MS, et al. Association between socioeconomic status and prevalence of non-communicable diseases risk factors and comorbidities in bangladesh: Findings from a nationwide cross-sectional survey. *BMJ Open* 2019; **9**:1-9.
- 58 Blakemore A, Hann M, Howells K, et al. Patient activation in older people with long-term conditions and multimorbidity: Correlates and change in a cohort study in the united kingdom. *BMC Health Services Res* 2016; **16**:582-82.
- 59 Blyth FM, Rochat S, Cumming RG, et al. Pain, frailty and comorbidity on older men: The champ study. *Pain* 2008; **140**:224-30.
- 60 Bowling CB, Deng L, Sakhuja S, Morey MC, Jaeger BC, Muntner P. Prevalence of activity limitations and association with multimorbidity among us adults 50 to 64 years old. *J Gen Intern Med* 2019; **34**:2390-96.
- 61 Britt HC, Harrison CM, Miller GC, Knox SA. Prevalence and patterns of multimorbidity in australia. *Med J Aust* 2008; **189**:72-77.
- 62 Broeiro-Gonçalves P, Nogueira P, Aguiar P. Multimorbidity and disease severity by age groups, in inpatients: Cross-sectional study. *Portuguese J Public Health* 2019; **37**:1-9.
- 63 Bruce SG, Riediger ND, Zacharias JM, Young TK. Obesity and obesity-related comorbidities in a canadian first nation population. *Chronic Dis Can* 2010; **31**:27-32.
- 64 Burgers JS, Voerman GE, Grol R, Faber MJ, Schneider EC. Quality and coordination of care for patients with multiple conditions: Results from an international survey of patient experience. *Eval Health Prof* 2010; **33**:343-64.
- 65 Burke BT. *Connections that count: A network analysis of multimorbidity and gait speed in older adults*, in *Department of Epidemiology (dissertation)*. 2017, Johns Hopkins University: Baltimore, Maryland.1-224.

- 66 Buurman BM, Frenkel WJ, Abu-Hanna A, Parlevliet JL, de Rooij SE. Acute and chronic diseases as part of multimorbidity in acutely hospitalized older patients. *Eur J Intern Med* 2016; **27**:68-75.
- 67 Calderón-Larrañaga A, Vetrano DL, Onder G, et al. Assessing and measuring chronic multimorbidity in the older population: A proposal for its operationalization. *J Gerontol A Biol Sci Med Sci* 2017; **72**:1417-23.
- 68 Camargo-Casas S, Suarez-Monsalve S, Zepeda MUP, García-Peña C, Cano-Gutierrez CA. Multimorbidity, depressive symptoms, and self-reported health in older adults: A secondary analysis of the sabe bogota study. *Rev Invest Clin* 2018; **70**:192-97.
- 69 Canevelli M, Raganato R, Remiddi F, et al. Counting deficits or diseases? The agreement between frailty and multimorbidity in subjects with cognitive disturbances. *Aging Clin Exp Res* 2019; **32**:179-82.
- 70 Chamberlain AM, Rutten LJF, Wilson PM, et al. Neighborhood socioeconomic disadvantage is associated with multimorbidity in a geographically-defined community. *BMC Public Health* 2020; **20**:1-10.
- 71 Chen H, Chen Y, Cui B. The association of multimorbidity with healthcare expenditure among the elderly patients in Beijing, China. *Arch Gerontol Geriatr* 2018; **79**:32-38.
- 72 Chen H, Cheng M, Zhuang Y, Broad JBJG, International G. Multimorbidity among middle-aged and older persons in urban china: Prevalence, characteristics and health service utilization. *Geriatr Gerontol Int* 2018; **18**:1447-52.
- 73 Cheung CL, Nguyen US, Au E, Tan KC, Kung AW. Association of handgrip strength with chronic diseases and multimorbidity: A cross-sectional study. *Age (Dordr)* 2013; **35**:929-41.
- 74 Chu T, Lau P, Cheng R, Chan M, Liang J. A study on the prevalence of multimorbidities of diseases and utilisation of public healthcare services in the new territories west area of Hong Kong. *Hong Kong Practitioner* 2018; **40**:43-50.
- 75 Chudasama YV, Khunti KK, Zaccardi F, et al. Physical activity, multimorbidity, and life expectancy: A UK biobank longitudinal study. *BMC Med* 2019; **17**:1-13.
- 76 Cimarras-Otal C, Calderón-Larrañaga A, Poblador-Plou B, et al. Association between physical activity, multimorbidity, self-rated health and functional limitation in the Spanish population. *BMC Public Health* 2014; **14**:1-10.
- 77 Chin WY, Choi EP, Wan EY, Lam CL. Health-related quality of life mediates associations between multi-morbidity and depressive symptoms in Chinese primary care patients. *Fam Pract* 2016; **33**:61-8.
- 78 Agrawal S, Agrawal PK. Association between body mass index and prevalence of multimorbidity in low-and middle-income countries: A cross-sectional study. *Int J Med Public Health* 2016; **6**:73-83.
- 79 Gu J, Chao J, Chen W, et al. Multimorbidity and health-related quality of life among the community-dwelling elderly: A longitudinal study. *Arch Gerontol Geriatr* 2018; **74**:133-40.
- 80 Gunn JM, Ayton DR, Densley K, et al. The association between chronic illness, multimorbidity and depressive symptoms in an australian primary care cohort. *Soc Psychiatry Psychiatr Epidemiol* 2010; **47**:175-84.
- 81 Han MA, Tinetti ME, Agostini JV, Han L, Lee H, Walke LM. The impact of medication use on symptom burden in older patients with multiple medical morbidities. *J Clin Gerontol and Geriatr* 2013; **4**:84-88.
- 82 Hanlon P, Nicholl BI, Jani BD, Lee D, McQueenie R, Mair FS. Frailty and pre-frailty in middle-aged and older adults and its association with multimorbidity and mortality:

- A prospective analysis of 493 737 UK biobank participants. *Lancet Public Health* 2018; **3**:e323-e32.
- 83 Jantsch AG, Alves RFS, Faerstein E. Educational inequality in Rio de Janeiro and its impact on multimorbidity: Evidence from the pró-saúde study. A cross-sectional analysis. *Sao Paulo Med J* 2018; **136**:51-58.
- 84 John R, Kerby DS, Hagan Hennessy C. Patterns and impact of comorbidity and multimorbidity among community-resident American Indian elders. *Gerontol* 2003; **43**:649-60.
- 85 Johnson-Lawrence V, Zajacova A, Sneed R. Education, race/ethnicity, and multimorbidity among adults aged 30-64 in the national health interview survey. *SSM Popul Health* 2017; **3**:366-72.
- 86 Johnston MC, Black C, Mercer SW, Prescott GJ, Crilly MA. Impact of educational attainment on the association between social class at birth and multimorbidity in middle age in the Aberdeen children of the 1950s cohort study. *BMJ Open* 2019; **9**:1-9.
- 87 Jones SM, Amtmann D, Gell NM. A psychometric examination of multimorbidity and mental health in older adults. *Aging Ment Health* 2016; **20**:309-17.
- 88 Jovic D, Marinkovic J, Vukovic D. Association between body mass index and prevalence of multimorbidity: A cross-sectional study. *Public Health* 2016; **139**:103-11.
- 89 Juul-Larsen HG, Andersen O, Bandholm T, et al. Differences in function and recovery profiles between patterns of multimorbidity among older medical patients the first year after an acute admission—an exploratory latent class analysis. *Arch Gerontol Geriatr* 2020; **86**:1-11.
- 90 Hudon C, Soubhi H, Fortin M. Relationship between multimorbidity and physical activity: Secondary analysis from the Quebec health survey. *BMC Public Health* 2008; **8**:1-8.
- 91 Hussain MA, Huxley RR, Al Mamun A. Multimorbidity prevalence and pattern in Indonesian adults: An exploratory study using national survey data. *BMJ Open* 2015; **5**:1-10.
- 92 Ie K, Felton M, Springer S, Wilson SA, Albert SM. Multimorbidity and polypharmacy in family medicine residency practices. *J Pharm Technol* 2017; **33**:219-24.
- 93 Ishizaki T, Kobayashi E, Fukaya T, Takahashi Y, Shinkai S, Liang J. Association of physical performance and self-rated health with multimorbidity among older adults: Results from a nationwide survey in japan. *Arch Gerontol Geriatr* 2019; **84**:1-9.
- 94 Danon-Hersch N, Rodondi N, Spagnoli J, Santos-Eggimann B. Prefrailty and chronic morbidity in the youngest old: An insight from the Lausanne cohort Lc65+. *J Am Geriatr Soc* 2012; **60**:1687-94.
- 95 de Heer HD, Balcázar HG, Morera OF, et al. Barriers to care and comorbidities along the u.S.-mexico border. *Public Health Rep* 2013; **128**:480-8.
- 96 Demirchyan A, Khachadourian V, Armenian HK, Petrosyan V. Short and long term determinants of incident multimorbidity in a cohort of 1988 earthquake survivors in Armenia. *Int. J. Equity Health* 2013; **12**:68-68.
- 97 Fabbri E, An Y, Zoli M, et al. Aging and the burden of multimorbidity: Associations with inflammatory and anabolic hormonal biomarkers. *J Gerontol A Biol Sci Med Sci* 2015; **70**:63-70.
- 98 Fillenbaum GGP, C. F.: Cohen, H. J.: Cornoni-Huntley, J. C.: Guralnik, J. M. Comorbidity of five chronic health conditions in elderly community residents: Determinants and impact on mortality. *J Gerontol: Med Sci* 2000; **55**:M84-89.

- 99 Kaneko M, Boven Kv, Takayanagi H, Kusaba T, Yamada T, Matsushima MJFp. Multicentre descriptive cross-sectional study of japanese home visit patients: Reasons for encounter, health problems and multimorbidity. *Fam Pract* 2019; **37**:227-33.
- 100 Kang J Song Y-M. The association between submarine service and multimorbidity: A cross-sectional study of korean naval personnel. *BMJ Open* 2017; **7**:1-6.
- 101 Gandhi K, Lim E, Davis J, Chen JJ. Racial-ethnic disparities in self-reported health status among us adults adjusted for sociodemographics and multimorbidities, national health and nutrition examination survey 2011-2014. *Ethn Health* 2020; **25**:65-78.
- 102 Costa CDS, Flores TR, Wendt A, et al. Inequalities in multimorbidity among elderly: A population-based study in a city in southern brazil. *Cad Saude Publica* 2018; **34**:1-12.
- 103 Rizzuto DM, R. J. F.: Angleman, S.: Qiu, C.: Marengoni, A. Effect of chronic diseases and multimorbidity on survival and functioning in elderly adults. *J Am Geriatr Soc* 2017; **65**:1056-60.
- 104 Dhalwani NN, Zaccardi F, O'Donovan G, et al. Association between lifestyle factors and the incidence of multimorbidity in an older english population. *J Gerontol A Biol Sci Med Sci* 2017; **72**:528-34.
- 105 Elixhauser A, Steiner C, Harris DR, Coffey RM. Comorbidity measures for use with administrative data. *Med Care* 1998; **36**:8-27.
- 106 Fabbri E, An Y, Schrack JA, et al. Energy metabolism and the burden of multimorbidity in older adults: Results from the baltimore longitudinal study of aging. *J Gerontol A Biol Sci Med Sci* 2015; **70**:1297-303.
- 107 Fortin M, Haggerty J, Almirall J, Bouhali T, Sasseville M, Lemieux M. Lifestyle factors and multimorbidity: A cross sectional study. *BMC Public Health* 2014; **14**:1-6.
- 108 Fuchs ZB, T.: Novikov, I.: Walter-Ginzburg, A.: Lyanders, M.: Gindin, J.: Habot, B.: Modan, B. Morbidity, comorbidity, and their association with disability among community-dwelling oldest-old in israel. *J Gerontol: Med Sci* 1998; **53**:M447-55.
- 109 Galenkamp H, Braam AW, Huisman M, Deeg DJ. Somatic multimorbidity and self-rated health in the older population. *J Gerontol B Psychol Sci Soc Sci* 2011; **66**:380-6.
- 110 Galenkamp H, Gagliardi C, Principi A, et al. Predictors of social leisure activities in older europeans with and without multimorbidity. *Eur J Ageing* 2016; **13**:129-43.
- 111 Gamma A Angst J. Concurrent psychiatric comorbidity and multimorbidity in a community study: Gender differences and quality of life. *Eur Arch Psychiatry Clin Neurosci* 2001; **251**:43-46.
- 112 Ge L, Yap CW, Heng BH. Sex differences in associations between multimorbidity and physical function domains among community-dwelling adults in Singapore. *PLoS One* 2018; **13**:1-14.
- 113 Ge L, Ong R, Yap CW, Heng BH. Effects of chronic diseases on health-related quality of life and self-rated health among three adult age groups. *Nurs Health Sci* 2019; **21**:214-22.
- 114 Gould CE, O'Hara R, Goldstein MK, Beaudreau SA. Multimorbidity is associated with anxiety in older adults in the health and retirement study. *Int J Geriatr Psychiatry* 2016; **31**:1105-15.
- 115 Habib RR, Hojeij S, Elzein K, Chaaban J, Seyfert K. Associations between life conditions and multi-morbidity in marginalized populations: The case of palestinian refugees. *Eur J Public Health* 2014; **24**:727-33.
- 116 Harrison C, Henderson J, Miller G, Britt H. The prevalence of diagnosed chronic conditions and multimorbidity in australia: A method for estimating population prevalence from general practice patient encounter data. *PLOS ONE* 2017; **12**:1-13.

- 117 Hayek S, Ifrah A, Enav T, Shohat T. Prevalence, correlates, and time trends of multiple chronic conditions among israeli adults: Estimates from the Israeli national health interview survey, 2014-2015. *Prev Chronic Dis* 2017; **14**:1-14.
- 118 Henninger DE, Whitson HE, Cohen HJ, Ariely D. Higher medical morbidity burden is associated with external locus of control. *J Am Geriatr Soc* 2012; **60**:751-55.
- 119 Hernández B, Reilly RB, Kenny RA. Investigation of multimorbidity and prevalent disease combinations in older irish adults using network analysis and association rules. *Sci Rep* 2019; **9**:1-12.
- 120 Ho C, Feng L, Fam J, Mahendran R, Kua EH, Ng TP. Coexisting medical comorbidity and depression: Multiplicative effects on health outcomes in older adults. *Int Psychogeriatr* 2014; **26**:1221-9.
- 121 Khan N, Rahman M, Mitra D, Afsana K. Prevalence of multimorbidity among bangladeshi adult population: A nationwide cross-sectional study. *BMJ Open* 2019; **9**:1-8.
- 122 Kiliari N, Theodosopoulou E, Papanastasiou E. Multimorbidity and unmet citizens' needs and expectations urge for reforms in the health system of cyprus: A questionnaire survey. *JRSM Open* 2014; **5**:1-11.
- 123 King DE, Xiang J, Pilkerton CS. Multimorbidity trends in united states adults, 1988-2014. *J Am Board Fam Med* 2018; **31**:503-13.
- 124 Kingston AR, L.: Booth, H.: Knapp, M.: Jagger, C.: Modem project. Projections of multi-morbidity in the older population in england to 2035: Estimates from the population ageing and care simulation (pacsim) model. *Age Ageing* 2018; **47**:374-80.
- 125 Koyanagi A, Lara E, Stubbs B, et al. Chronic physical conditions, multimorbidity, and mild cognitive impairment in low- and middle-income countries. *J Am Geriatr Soc* 2018; **66**:721-27.
- 126 Kriegsman DMD, D. J.: Stalman, W. A. Comorbidity of somatic chronic diseases and decline in physical functioning;; the longitudinal aging study amsterdam. *J Clin Epidemiol* 2004; **57**:55-65.
- 127 Kristensen K, König HH, Hajek A. The longitudinal association of multimorbidity on loneliness and network size: Findings from a population-based study. *Int J Geriatr Psychiatry* 2019; **34**:1490-97.
- 128 Kristensen K, König HH, Hajek A. The association of multimorbidity, loneliness, social exclusion and network size: Findings from the population-based german ageing survey. *BMC Public Health* 2019; **19**:1-10.
- 129 Kunna R, San Sebastian M, Stewart Williams J. Measurement and decomposition of socioeconomic inequality in single and multimorbidity in older adults in china and ghana: Results from the who study on global ageing and adult health (sage). *Int J Equity Health* 2017; **16**:2-17.
- 130 Kusumastuti S, Gerds TA, Lund R, Mortensen EL, Westendorp RGJ. Discrimination ability of comorbidity, frailty, and subjective health to predict mortality in community-dwelling older people: Population based prospective cohort study. *Eur J Intern Med* 2017; **42**:29-38.
- 131 Lai FTT, Guthrie B, Wong SYS, et al. Sex-specific intergenerational trends in morbidity burden and multimorbidity status in hong kong community: An age-period-cohort analysis of repeated population surveys. *BMJ Open* 2019; **9**:1-10.
- 132 Lai FTT, Ma TW, Hou WK. Multimorbidity is associated with more subsequent depressive symptoms in three months: A prospective study of community-dwelling adults in hong kong. *Int Psychogeriatr* 2018; **31**:1367-71.
- 133 Lares PA Perelman J. The current and projected burden of multimorbidity: A cross-sectional study in a southern europe population. *Eur J Ageing* 2019; **16**:181-92.

- 134 Lang K, Alexander IM, Simon J, et al. The impact of multimorbidity on quality of life among midlife women: Findings from a u.S. Nationally representative survey. *J Women's Health* 2015; **24**:374-83.
- 135 Le Cossec C, Perrine AL, Beltzer N, Fuhrman C, Carcaillon-Bentata L. Pre-frailty, frailty, and multimorbidity: Prevalences and associated characteristics from two french national surveys. *J Nutr Health Aging* 2016; **20**:860-69.
- 136 Lee TA, Shields AE, Vogeli C, et al. Mortality rate in veterans with multiple chronic conditions. *J Gen Intern Med* 2007; **22** 403-7.
- 137 Lee WJ, Peng LN, Lin CH, Lin HP, Loh CH, Chen LK. The synergic effects of frailty on disability associated with urbanization, multimorbidity, and mental health: Implications for public health and medical care. *Sci Rep* 2018; **8**:1-7.
- 138 Li J, Green M, Kearns B, et al. Patterns of multimorbidity and their association with health outcomes within yorkshire, england: Baseline results from the yorkshire health study. *BMC Public Health* 2016; **16**:1-9.
- 139 Li Y, White K, O'Shields KR, McLain AC, Merchant AT. Light-intensity physical activity and cardiometabolic risk among older adults with multiple chronic conditions. *Am J Health Promot* 2019; **33**:507-15.
- 140 Lujic S, Simpson JM, Zwar N, Hosseinzadeh H, Jorm L. Multimorbidity in australia: Comparing estimates derived using administrative data sources and survey data. *PLoS One* 2017; **12**:1-18.
- 141 Lupiáñez-Villanueva F, Anastasiadou D, Codagnone C, Nuño-Solinís R, Garcia-Zapirain Soto MB. Electronic health use in the european union and the effect of multimorbidity: Cross-sectional survey. *J Med Internet Res* 2018; **20**:1-14.
- 142 Zhou C-h, Tang S-f, Wang X-h, et al. Satisfaction about patient-centeredness and healthcare system among patients with chronic multimorbidity. *Current Med Sci* 2018; **38**:184-90.
- 143 Zhang R, Lu Y, Shi L, Zhang S, Chang F. Prevalence and patterns of multimorbidity among the elderly in china: A cross-sectional study using national survey data. *BMJ Open* 2019; **9**:1-9.
- 144 Wong CH, Weiss D, Sourial N, et al. Frailty and its association with disability and comorbidity in a community-dwelling sample of seniors in montreal: A cross-sectional study. *Aging Clin Exp Res* 2010; **22**:54-62.
- 145 Weimann A, Dai D, Oni T. A cross-sectional and spatial analysis of the prevalence of multimorbidity and its association with socioeconomic disadvantage in south africa: A comparison between 2008 and 2012. *Soc Sci Med* 2016; **163**:144-56.
- 146 Wang L, Palmer AJ, Cocker F, Sanderson K. Multimorbidity and health-related quality of life (hrqol) in a nationally representative population sample: Implications of count versus cluster method for defining multimorbidity on hrqol. *Health Qual life Outcomes* 2017; **15**:1-12.
- 147 Wang C, Pu R, Li Z, et al. Subjective health and quality of life among elderly people living with chronic multimorbidity and difficulty in activities of daily living in rural South Africa. *Clin Interv Aging* 2019; **14**:1285-96.
- 148 Wade A, Hobbs M, Green MA. Investigating the relationship between multimorbidity and dental attendance: A cross-sectional study of uk adults. *British Dental Journal* 2019; **226**:138-43.
- 149 Maciejewski ML Hammill BG. Measuring the burden of multimorbidity among medicare beneficiaries via condition counts and cumulative duration. *Health Serv Res* 2019; **54**:484-91.
- 150 Marengoni A, Angleman S, Meinow B, et al. Coexisting chronic conditions in the older population: Variation by health indicators. *Eur J Intern Med* 2016; **31**:29-34.

- 151 Marengoni A, von Strauss E, Rizzuto D, Winblad B, Fratiglioni L. The impact of chronic multimorbidity and disability on functional decline and survival in elderly persons. A community-based, longitudinal study. *J Intern Med* 2009; **265**:288-95.
- 152 Marques A, Santos DA, Peralta M, Sardinha LB, González Valeiro M. Regular physical activity eliminates the harmful association of television watching with multimorbidity. A cross-sectional study from the european social survey. *Prev Med* 2018; **109**:28-33.
- 153 Mavaddat N, Valderas JM, van der Linde R, Khaw KT, Kinmonth AL. Association of self-rated health with multimorbidity, chronic disease and psychosocial factors in a large middle-aged and older cohort from general practice: A cross-sectional study. *BMC Fam Pract* 2014; **15**:1-11.
- 154 McDaid O, Hanly MJ, Richardson K, Kee F, Kenny RA, Savva GM. The effect of multiple chronic conditions on self-rated health, disability and quality of life among the older populations of northern ireland and the republic of ireland: A comparison of two nationally representative cross-sectional surveys. *BMJ Open* 2013; **3**:1-9.
- 155 Melis R, Marengoni A, Angleman S, Fratiglioni L. Incidence and predictors of multimorbidity in the elderly: A population-based longitudinal study. *PLoS One* 2014; **9**:1-8.
- 156 Min LC, Wenger NS, Fung C, et al. Multimorbidity is associated with better quality of care among vulnerable elders. *Med Care* 2007; **45**:480-8.
- 157 Momtaz YA, Hamid TA, Yahaya N, Ibrahim R. Effects of chronic comorbidity on psychological well-being among older persons in northern peninsular Malaysia. *Appl Res Qual Life* 2010; **5**:133-46.
- 158 Mondor L, Cohen D, Khan AI, Wodchis WP. Income inequalities in multimorbidity prevalence in ontario, canada: A decomposition analysis of linked survey and health administrative data. *Int J Equity Health* 2018; **17**:1-13.
- 159 Muggah E, Graves E, Bennett C, Manuel DG. The impact of multiple chronic diseases on ambulatory care use; a population based study in ontario, canada. *BMC Health Serv Res* 2012; **12**:1-6.
- 160 Nagel A, Jungert A, Spinneker A, Neuhäuser-Berthold M. The impact of multimorbidity on resting metabolic rate in community-dwelling women over a ten-year period: A cross-sectional and longitudinal study. *J Nutr Health Aging* 2017; **21**:781-86.
- 161 Niedzwiedz CL, Katikireddi SV, Pell JP, Smith DJ. Sex differences in the association between salivary telomere length and multimorbidity within the us health & retirement study. *Age Ageing* 2019; **48**:703-10.
- 162 Nunes BP, Camargo-Figuera FA, Guttier M, et al. Multimorbidity in adults from a southern brazilian city: Occurrence and patterns. *Int J Public Health* 2016; **61**:1013-20.
- 163 Nunes BP, Chiavegatto Filho ADP, Pati S, et al. Contextual and individual inequalities of multimorbidity in brazilian adults: A cross-sectional national-based study. *BMJ Open* 2017; **7**:1-12.
- 164 Nunes BP, Thumé E, Facchini LA. Multimorbidity in older adults: Magnitude and challenges for the brazilian health system. *BMC Public Health* 2015; **15**:1-11.
- 165 Olaya B, Domènech-Abella J, Moneta MV, et al. All-cause mortality and multimorbidity in older adults: The role of social support and loneliness. *Exp Gerontol* 2017; **99**:120-26.
- 166 Olivares DEV, Chambi FRV, Chañi EMM, Craig WJ, Pacheco SOS, Pacheco FJ. Risk factors for chronic diseases and multimorbidity in a primary care context of

- central argentina: A web-based interactive and cross-sectional study. *Int J Environ Res Public Health* 2017; **14**:1-22.
- 167 Park B, Ock M, Lee HA, et al. Multimorbidity and health-related quality of life in koreans aged 50 or older using knhanes 2013-2014. *Health Qual Life Outcomes* 2018; **16**:1-10.
- 168 Patel KV, Peek MK, Wong R, Markides KS. Comorbidity and disability in elderly mexican and mexican american adults: Findings from mexico and the southwestern united states. *J Aging Health* 2006; **18**:315-29.
- 169 Pati S, Hussain MA, Swain S, et al. Development and validation of a questionnaire to assess multimorbidity in primary care: An indian experience. *BioMed Res Int* 2016; **2016**:1-9.
- 170 Pati SS, Subhashisa: Knottnerus, J.: Metsemakers, Job F.: van den Akker, Marjan. Health related quality of life in multimorbidity: A primary-care based study from odisha, India. *Health Qual Life Outcomes* 2019; **17**:1-11.
- 171 Payne RA, Abel GA, Guthrie B, Mercer SW. The effect of physical multimorbidity, mental health conditions and socioeconomic deprivation on unplanned admissions to hospital: A retrospective cohort study. *Can Med Assoc J* 2013; **185**:E221-8.
- 172 Pérez LM, Hooshmand B, Mangialasche F, et al. Glutathione serum levels and rate of multimorbidity development in older adults. *J Gerontol A Biol Sci Med Sci* 2020; **75**:1089-94.
- 173 Petersen I, Rathod S, Kathree T, Selohilwe O, Bhana A. Risk correlates for physical-mental multimorbidities in south africa: A cross-sectional study. *Epidemiol Psychiatr Sci* 2019; **28**:418-26.
- 174 Pfortmueller CA, Stotz M, Lindner G, Müller T, Rodondi N, Exadaktylos AK. Multimorbidity in adult asylum seekers: A first overview. *PloS one* 2013; **8**:1-7.
- 175 Pressley JC Patrick CH. Frailty bias in comorbidity risk adjustments of community-dwelling elderly populations. *J Clin Epidemiol* 1999; **52**:753-60.
- 176 Prior A, Fenger-Grøn M, Larsen KK, et al. The association between perceived stress and mortality among people with multimorbidity: A prospective population-based cohort study. *Am J Epidemiol* 2016; **184**:199-210.
- 177 Ribeiro AS, Pereira LC, Silva DRP, et al. Physical activity and sitting time are specifically associated with multiple chronic diseases and medicine intake in brazilian older adults. *J Aging Phys Act* 2018; **26**:608-13.
- 178 Ruel G, Lévesque J-F, Stocks N, et al. Understanding the evolution of multimorbidity: Evidences from the north west adelaide health longitudinal study (nwaHS). *PLOS ONE* 2014; **9**:1-11.
- 179 Ruel G, Shi Z, Zhen S, et al. Association between nutrition and the evolution of multimorbidity: The importance of fruits and vegetables and whole grain products. *Clin Nutr* 2014; **33**:513-20.
- 180 Ryan A, Murphy C, Boland F, Galvin R, Smith SM. What is the impact of physical activity and physical function on the development of multimorbidity in older adults over time? A population-based cohort study. *J Gerontol A Biol Sci Med Sci* 2018; **73**:1538-44.
- 181 Schmidt AE, Ilinca S, Schulmann K, et al. Fit for caring: Factors associated with informal care provision by older caregivers with and without multimorbidity. *Eur J Ageing* 2016; **13**:103-13.
- 182 Schöttker B, Saum KU, Jansen EH, Holleczeck B, Brenner H. Associations of metabolic, inflammatory and oxidative stress markers with total morbidity and multimorbidity in a large cohort of older german adults. *Age Ageing* 2016; **45**:127-35.

- 183 Seo JC, B.: Kim, S.: Lee, H.: Oh, D. The relationship between multiple chronic diseases and depressive symptoms among middle-aged and elderly populations: Results of a 2009 Korean community health survey of 156,747 participants. *BMC Public Health* 2017; **17**:1-10.
- 184 She R, Yan Z, Jiang H, Vetrano DL, Lau JTF, Qiu C. Multimorbidity and health-related quality of life in old age: Role of functional dependence and depressive symptoms. *J Am Med Dir Assoc* 2019; **20**:1143-49.
- 185 Singh K, Patel SA, Biswas S, et al. Multimorbidity in South Asian adults: Prevalence, risk factors and mortality. *J Public Health (Oxf)* 2019; **41**:80-89.
- 186 Spangenberg L, Forkmann T, Brähler E, Glaesmer H. The association of depression and multimorbidity in the elderly: Implications for the assessment of depression. *Psychogeriatr* 2011; **11**:227-34.
- 187 Stickley A, Koyanagi A, Ueda M, Inoue Y, Waldman K, Oh H. Physical multimorbidity and suicidal behavior in the general population in the United States. *J Affect Disord* 2020; **260**:604-09.
- 188 Streit S, da Costa BR, Bauer DC, et al. Multimorbidity and quality of preventive care in Swiss university primary care cohorts. *PLOS ONE* 2014; **9**:1-7.
- 189 Stubbs B, Vancampfort D, Veronese N, et al. Multimorbidity and perceived stress: A population-based cross-sectional study among older adults across six low- and middle-income countries. *Maturitas* 2018; **107**:84-91.
- 190 Su P, Ding H, Zhang W, et al. The association of multimorbidity and disability in a community-based sample of elderly aged 80 or older in Shanghai, China. *BMC Geriatr* 2016; **16**:1-7.
- 191 Sundstrup E, Jakobsen MD, Mortensen OS, Andersen LL. Joint association of multimorbidity and work ability with risk of long-term sickness absence: A prospective cohort study with register follow-up. *Scand J Work Environ Health* 2017; **43**:146-54.
- 192 Takahashi PY, Ryu E, Hathcock MA, et al. A novel housing-based socioeconomic measure predicts hospitalisation and multiple chronic conditions in a community population. *J Epidemiol Community Health* 2016; **70**:286-91.
- 193 Tinetti MEM, G. J.: Chang, S. S.: Newman, A. B.: Fitzpatrick, A. L.: Fried, T. R.: Peduzzi, P. N. Contribution of multiple chronic conditions to universal health outcomes. *J Am Geriatr Soc* 2011; **59**:1686-91.
- 194 Troelstra SA, Straker L, Harris M, Brown S, van der Beek AJ, Coenen P. Multimorbidity is common among young workers and related to increased work absenteeism and presenteeism: Results from the population-based Raine Study cohort. *Scand J Work Environ Health* 2020; **46**:218-27.
- 195 van Zon SKR, Reijneveld SA, Galaurchi A, Mendes de Leon CF, Almansa J, Bültmann U. Multimorbidity and the transition out of full-time paid employment: A longitudinal analysis of the Health and Retirement Study. *J Gerontol B Psychol Sci Soc Sci* 2020; **75**:705-15.
- 196 Vancampfort D, Stubbs B, Koyanagi A. Physical chronic conditions, multimorbidity and sedentary behavior amongst middle-aged and older adults in six low- and middle-income countries. *Int J Behav Nutr Phys Act* 2017; **14**:1-13.
- 197 Vassilaki M, Aakre JA, Cha RH, et al. Multimorbidity and risk of mild cognitive impairment. *J Am Geriatr Soc* 2015; **63**:1783-90.
- 198 Vassilaki M, Aakre JA, Mielke MM, et al. Multimorbidity and neuroimaging biomarkers among cognitively normal persons. *Neurology* 2016; **86**:2077-84.
- 199 Villarreal AEG, S.: Lopez, L.: Britton, G. B.: Initiative, P. A. R. Cognitive impairment, depression, and cooccurrence of both among the elderly in Panama:

- Differential associations with multimorbidity and functional limitations. *BioMed Res Int* 2015; **2015**:1-7.
- 200 Violán C, Foguet-Boreu Q, Fernández-Bertolín S, et al. Soft clustering using real-world data for the identification of multimorbidity patterns in an elderly population: Cross-sectional study in a mediterranean population. *BMJ Open* 2019; **9**:1-14.
- 201 von Strauss E, Fratiglioni L, Viitanen M, Forsell Y, Winblad B. Morbidity and comorbidity in relation to functional status: A community-based study of the oldest old (90+ years). *J Am Geriatr Soc* 2000; **48**:1462-9.
- 202 Vos HM, Bor HH, Rangelrooij-Minkels MJ, Schellevis FG, Lagro-Janssen AL. Multimorbidity in older women: The negative impact of specific combinations of chronic conditions on self-rated health. *Eur J Gen Pract* 2013; **19**:117-22.
- 203 Vu HMN, L. H.: Tran, T. H.: Pham, K. T. H.: Phan, H. T.: Nguyen, H. N.: Tran, B. X.: Latkin, C. A.: Ho, C. S. H.: Ho, R. C. M. Effects of chronic comorbidities on the health-related quality of life among older patients after falls in vietnamese hospitals. *Int J Environ Res Public Health* 2019; **16**:1-9.
- 204 Wang L, Cocker F, Kilpatrick M, et al. The associations of multimorbidity with health-related productivity loss in a large and diverse public sector setting: A cross-sectional survey. *J Occup Environ Med* 2018; **60**:528-35.
- 205 Wang X-X, Lin W-Q, Chen X-J, et al. Multimorbidity associated with functional independence among community-dwelling older people: A cross-sectional study in southern china. *Health Qual Life Outcomes* 2017; **15**:73-9.
- 206 Wijers IGM, Ayala A, Rodriguez-Blazquez C, et al. The disease burden morbidity assessment in older adults and its association with mortality and other health outcomes. *Eur J Ageing* 2019; **16**:193-203.
- 207 Williams JSE, L. E. The association between multimorbidity and quality of life, health status and functional disability. *Am J Med Sci* 2016; **352**:45-52.
- 208 Woldeamayrat EM, Kassa A, Gari T, Dangisso MH. Chronic diseases multimorbidity among adult patients at hawassa university comprehensive specialized hospital. *BMC Public Health* 2018; **18**:1-8.
- 209 Yao SS, Cao GY, Han L, et al. Associations between somatic multimorbidity patterns and depression in a longitudinal cohort of middle-aged and older chinese. *J Am Med Dir Assoc* 2020; **21**:1282-87.
- 210 Yorke AM, Curtis AB, Shoemaker M, Vangsnes E. The impact of multimorbidity on grip strength in adults age 50 and older: Data from the health and retirement survey (hrs). *Arch Gerontol Geriatr* 2017; **72**:164-68.
- 211 You L, Yu Z, Zhang X, et al. Association between multimorbidity and depressive symptom among community-dwelling elders in eastern china. *Clin Interv Aging* 2019; **14**:2273-80.
- 212 Zhang L, Ma L, Sun F, Tang Z, Chan P. A multicenter study of multimorbidity in older adult inpatients in china. *J Nutr Health Aging* 2020; **24**:269-76.
- 213 Khanam MA, Streatfield PK, Kabir ZN, Qiu C, Cornelius C, Wahlin Å. Prevalence and patterns of multimorbidity among elderly people in rural bangladesh: A cross-sectional study. *J Health, Popul Nutr* 2011; **29**:406-14.
- 214 Cornell J, Pugh J, Williams, Jr., et al. Multimorbidity clusters: Clustering binary data from multimorbidity clusters: Clustering binary data from a large administrative medical database. *Appl Multivar Res* 2009; **12**:1-6.
- 215 Cassell A, Edwards D, Harshfield A, et al. The epidemiology of multimorbidity in primary care: A retrospective cohort study. *Br J GenPract* 2018; **68**:e245-e51.

- 216 Wong ELY, Xu RH, Cheung AWI. Measuring the impact of chronic conditions and associated multimorbidity on health-related quality of life in the general population in hong kong sar, china: A cross-sectional study. *PLOS ONE* 2019; **14**:1-16.
- 217 Puth M-T, Weckbecker K, Schmid M, Münster E. Prevalence of multimorbidity in germany: Impact of age and educational level in a cross-sectional study on 19,294 adults. *BMC Public Health* 2017; **17**:1-7.
